# 1 Bulkhead-like apical membrane structures between hepatocytes are required 2 for anisotropic lumen expansion and liver tissue morphogenesis

3 Lenka Belicova<sup>1</sup>, Urska Repnik<sup>1,2</sup>, Julien Delpierre<sup>1</sup>, Elzbieta Gralinska<sup>3</sup>, Sarah Seifert<sup>1</sup>, José  
4 Ignacio Valenzuela<sup>1</sup>, Hernán Andrés Morales-Navarrete<sup>1</sup>, Christian Franke<sup>1,6</sup>, Helin Räägel<sup>1,7</sup>,  
5 Evgeniya Shcherbinina<sup>4</sup>, Tatiana Prikazchikova<sup>4</sup>, Victor Koteliansky<sup>4</sup>, Martin Vingron<sup>3</sup>, Yannis  
6 Kalaidzidis<sup>1</sup>, Timofei Zatsepin<sup>4,5</sup> and Marino Zerial<sup>1, 8,\*</sup>

## 7 Affiliations

8 <sup>1</sup>Max Planck Institute of Molecular Cell Biology and Genetics, 01307 Dresden, Germany.

9 <sup>2</sup>Present address: Zentrale Mikroskopie im Biologiezentrum der Christian-Albrechts-Universität zu Kiel, 24118 Kiel,  
10 Germany.

11 <sup>3</sup>Department of Computational Molecular Biology, Max Planck Institute for Molecular Genetics, 14195 Berlin,  
12 Germany.

13 <sup>4</sup>Skolkovo Institute of Science and Technology, Skolkovo, Russia.

14 <sup>5</sup>Lomonosov Moscow State University, Department of Chemistry, Moscow, 119991, Russia.

15 <sup>6</sup> Present address: Institute of Applied Optics and Biophysics, Friedrich-Schiller-University Jena, Max-Wien Platz 4,  
16 07743 Jena, Germany.

17 <sup>7</sup>Nelson Laboratories LLC, Salt Lake City, Utah 84123, United States.

18 <sup>8</sup>Lead contact

19 \*Correspondence: zerial@mpi-cbg.de

20

## 21 Summary

22 Cell polarity is key to epithelial organization. Whereas polarized epithelial cells have a single  
23 apico-basal axis, hepatocytes exhibit a complex multi-axial polarity. During development, the  
24 apical surfaces of hepatocytes elongate anisotropically, generating a 3D tubular network of bile  
25 canaliculi (BC). Here, to elucidate the mechanisms of hepatocyte polarity and re-engineer it into  
26 simple epithelial polarity, we optimised a culture system of primary mouse hepatoblasts that  
27 recapitulates hepatocyte differentiation and BC morphogenesis. Remarkably, we discovered a  
28 pattern of specific extensions of the apical membrane sealed by tight junctions traversing the  
29 lumen between two adjacent hepatocytes that remind the bulkheads of boats. These apical  
30 bulkheads were observed also in the developing liver. Screening for molecular factors required  
31 for hepatocyte polarity revealed that silencing of Rab35 caused loss of the bulkheads,  
32 conversion into simple polarity, formation of cyst-like structures and change in cell fate. By

33 exploiting Rab35 depletion in the developing liver we could re-engineer hepatocyte polarity and  
34 trigger formation of epithelial tubes. Our results suggest a new model of BC morphogenesis  
35 based on mechanical stabilization of the tubular lumen.

## 36 **Introduction**

37 Epithelial tubes are essential components of several organs, such as kidney and  
38 intestine. They are composed of cells that exhibit apico-basal polarity, with the apical surface  
39 facing the internal *lumen* and the basal surface contacting the basement membrane (Andrew  
40 and Ewald, 2010; Bryant and Mostov, 2008). The liver contains two types of epithelial cells, bile  
41 duct cells (cholangiocytes) and hepatocytes, both derived from embryonic progenitors called  
42 hepatoblasts (Müsch, 2018). Bile duct cells are cuboidal or columnar epithelial cells with the  
43 typical apico-basal polarity and the apical surfaces sharing a common lumen (Boyer, 2013;  
44 Treyer & Müsch, 2013). Hepatocytes, the most abundant epithelial cells of the liver  
45 parenchyma, have a specialized polarity which cannot be described using only one apico-basal  
46 axis as in simple epithelia (Treyer & Müsch, 2013). Hepatocytes are multi-polar with bi-axial  
47 polarity characterized by two nematic axes (Morales-Navarrete et al., 2019). *In vivo*, each  
48 hepatocyte faces the sinusoidal endothelium via multiple basal domains and can initiate apical  
49 *lumina* with several neighbouring hepatocytes. In the developing liver, hepatocyte lumina  
50 anisotropically elongate as a tubular belt surrounding the cells, intersecting the contact  
51 membranes between two neighbouring hepatocytes (lateral domain). The lumina eventually  
52 interconnect to create a complex 3D luminal network of highly ramified  $\sim 1 \mu\text{m}$ -thin bile  
53 canaliculi (BC) (Morales-Navarrete et al., 2015). The function of BC is to transport the bile  
54 secreted from the apical surface of the hepatocytes towards the bile ducts. Bile flow through BC  
55 is supported by the osmotic pressure but also by a significant contribution of acto-myosin-  
56 dependent contractility (Meyer et al., 2017; Watanabe et al., 1991). However, the fact that such  
57 contractility does not appear to yield peristaltic movements is puzzling and calls for a  
58 mechanistic explanation.

59 Liver tissue organization and function therefore depends on the generation of simple  
60 epithelial polarity vs. hepatocyte polarity and their resulting lumen morphologies, whose

61 mechanisms are not fully understood (Gissen and Arias, 2015; Müsch, 2014, 2018; Ober and  
62 Lemaigre, 2018; Tanimizu and Mitaka, 2017). In 3D *in vitro* cultures, bile duct cells form  
63 spherical cysts with a hollow lumen, similar to the well-studied MDCK cell system (O'Brien et  
64 al., 2002; Tanimizu et al., 2007). Hepatocytes, on the other hand, can polarize and form BC-like  
65 structures *in vitro* (Fu et al., 2010; Zeigerer et al., 2017). Interestingly, overexpression of Par1b  
66 in MDCK cells altered the spindle orientation and resulted in the reorganization of the lumina  
67 such that they resembled that of hepatocytes. Conversely, Par1b down-regulation in  
68 hepatocyte cell lines (HepG2 and WIF9B) re-oriented the microtubules as in epithelial cells,  
69 leading to simple apico-basal polarity (Cohen et al., 2004b, 2004a; Lázaro-Diéguez et al., 2013;  
70 Slim et al., 2013). However, these studies were conducted on hepatocyte cell lines which do not  
71 recapitulate the peculiar elongated tubular morphology of BC, but rather form lateral spherical  
72 lumina (Cohen et al., 2004b; de Marco et al., 2002). The mechanisms underlying the  
73 morphogenesis of the elongated and branched morphology of BC still remain elusive (Fu et al.,  
74 2010, 2011; Li et al., 2016).

75 In early development (E13-14 in mouse and rat), clusters of hepatocytes generate small  
76 separate spherical lumina that eventually interconnect into a continuous network, concomitant  
77 with hematopoietic progenitors leaving the liver (E17-21) (Ober and Lemaigre, 2018; Tanimizu  
78 and Mitaka, 2016; Treyer and Müsch, 2013). Based on *in vitro* studies using hepatocyte cell lines  
79 or primary hepatocytes, Tanimizu and Mitaka (2017) argued for a model where cell division is a  
80 key determinant of apical lumen elongation. According to this model, actively proliferating  
81 foetal hepatocytes change the mode of cell division. In the first stage, hepatocytes divide  
82 asymmetrically and form different lumina with neighbouring hepatocytes (Overeem et al.,  
83 2015). If cell division is symmetric, e.g. upon Par1b depletion, cells share the same lumen by  
84 forming a cyst (Slim et al., 2013). In the second stage, hepatocytes orient their spindle  
85 orthogonal to the lumen axis and undergo an incomplete division that prevents lumen  
86 partitioning between two daughter cells, thus leading the initial spherical lumen to elongate  
87 into a typical BC tubule (Tanimizu and Mitaka, 2017; Wang et al., 2014). In the developing liver  
88 however, as hepatoblasts differentiate into hepatocytes, they gradually stop proliferating,  
89 declining from 25% dividing at E14.5 to mostly quiescent at E17.5 (Yang et al., 2017). Yet,

90 between E14.5 and E17.5, the small isolated apical lumina expand and generate an almost fully  
91 connected BC network (Tanimizu et al., 2016; see below Fig. 7C). This means that foetal  
92 hepatocytes require additional mechanisms independent of cell division to elongate BC that  
93 could not be captured in cell lines or mature hepatocyte model systems.

94 We can envisage a model where a lumen elongates via anisotropic tension of the apical  
95 plasma membrane. The tubular structures in other systems, such as for example the *Drosophila*  
96 tracheal tube, possess a periodic supra-cellular actin pattern (Hannezo et al., 2015; Hayashi and  
97 Dong, 2017) that could help stabilizing hepatocyte lumina as they elongate and prevent an  
98 isotropic expansion. Up to date, there is only little understanding of the generation and  
99 elongation of hepatocyte apical lumina (Li et al., 2016; Müsch, 2018; Ober and Lemaigre, 2018;  
100 Tanimizu and Mitaka, 2017).

101 In this study, we used cultures of primary mouse hepatoblasts to elucidate the  
102 mechanisms underlying the anisotropic expansion of the apical lumen for BC formation. We  
103 succeeded in re-engineering the polarity of hepatocytes and converting it into the polarity of  
104 simple epithelial cells, generating epithelial tubes instead of BC in the developing embryonic  
105 liver.

## 106 **Results**

### 107 **Lumen morphogenesis in hepatocytes is accompanied by specific actin structures that** 108 **interconnect the two lumen-forming cells**

109 To understand how hepatocytes polarize to form apical lumina of tubular shape, we  
110 took advantage of a well-established culture of primary mouse hepatoblasts isolated from  
111 embryonic livers based on *Dlk* expression (Tanimizu et al., 2003), but optimized the conditions  
112 (Methods) to differentiate them into hepatocytes and generate BC *in vitro* (Figure 1A). The  
113 hepatoblasts formed elongated and branched tubular lumina enriched in F-actin, and positive  
114 for the apical marker CD13 and the tight junction protein ZO-1 (Figure 1B). This system  
115 therefore recapitulates the formation of branched BC-lumina *in vitro* similar to the developing  
116 liver *in vivo*. The differentiation to hepatocytes was confirmed by gene expression profiling. We

117 used RNA-seq to compare isolated hepatoblasts, *in vitro* differentiated hepatocytes and mature  
118 hepatocytes isolated from adult livers as control. *In vitro* differentiated hepatocytes down-  
119 regulated the hepatoblast marker *Dlk* and up-regulated genes expressed in mature  
120 hepatocytes, e.g. metabolic genes such as *Tat*, *G6pc*, *Pck1*, *Cyp3a11* (Figure 1C).

121 To study lumen morphogenesis, we performed live-cell time-lapse microscopy on  
122 differentiating hepatoblasts stably expressing LifeAct-EGFP as actin label. We followed  
123 lumenogenesis for up to 52 hours in 10 minute intervals and categorised four sequential steps:  
124 1) lumen initiation, 2) elongation, 3) branching and 4) fusion. We frequently observed single  
125 cells initiating multiple individual lumina with their neighbours (Figure S1A, Video Figure S1A).  
126 Interestingly, such multiplicity of lumina formed independently of cell division. This is a general  
127 phenomenon because dividing cells were rarely observed. After formation, lumina elongated  
128 into tubes until they spanned the entire cell-cell contact (Figure 1D, S1A, S1B, S1C, Videos  
129 Figure 1D, S1A, S1B, S1C). At this point, a lumen could fuse with another lumen (Figure S1B, left  
130 panels) branching at a 3-cell contact (Figure S1B, right panels).

131 The elongation of lumina in the absence of cell division implies the existence of  
132 anisotropic forces. Interestingly, we also observed instances when the lumina transiently  
133 acquired a rounded shape (Figure 1D, Figure S1C, Videos Figure 1D, S1C) but these structures  
134 did not expand isotropically to form a spherical lumen. They were subsequently “corrected”,  
135 suggesting the existence of control mechanisms which actively enforce anisotropy to prevent  
136 the formation of cyst-like structures typical of epithelial cells (Bryant and Mostov, 2008).

137 We were intrigued by the presence of dark stripes in the bright-field, transverse to the  
138 direction of lumen elongation (e.g. Figure 1D, S1) which may correspond to high curvature of  
139 the apical membranes. The stripes also coincided with areas of high density of actin (LifeAct-  
140 EGFP) and gave the impression to originate mainly from one cell. We will see below that this  
141 asymmetry of stripes is most likely due to mismatch orientation of focal plane vs. convoluted  
142 cell-cell contacts. The pattern was evident early in lumen formation and continued as the  
143 lumina elongated, keeping a characteristic spacing between stripes (Figure 1D, S1).  
144 Interestingly, when the lumen bulged outward, for example in Figure 1D' (marked with a star),

145 tending to a spherical lumen, it coincided with the loss of the stripes. Subsequently, the tubular  
146 shape of the lumen recovered once additional stripes formed, suggesting an active link  
147 between the striped pattern and the anisotropy of lumen elongation.

148 To determine the micro-structure of the actin-rich stripes, we analysed the cortical F-  
149 actin labelled with Phalloidin-Alexa-647 using single-molecule localization microscopy (SMLM)  
150 on fixed, *in vitro* differentiated hepatocytes. Strikingly, we observed a *quasi*-periodic pattern of  
151 F-actin structures apparently crossing the lumen between two cells (Figure 1E). Because the  
152 SMLM has a z-resolution of ~500 nm and these structures are >1  $\mu\text{m}$  in height, we can conclude  
153 that the F-actin projects into the BC lumen and does not correspond to rings around it, as in the  
154 *Drosophila* tracheal tube (Hannezo et al., 2015; Hayashi and Dong, 2017).

#### 155 **Ultra-structural analysis reveals a bulkhead-like pattern of transversal structures in the BC** 156 **lumen physically connecting the apical surfaces of adjacent cells**

157 Given the presence of both actin filaments and tight junctions (ZO-1) traversing the  
158 lumen, we investigated the structure of the apical surfaces of the juxtaposed cells in greater  
159 detail by electron microscopy (EM) on serial sections and 3D reconstructions of the entire  
160 lumen volume. Remarkably, the EM section of Figure 2A shows a branched lumen between  
161 three hepatocytes, with the characteristic glycogen granules, whose surfaces are connected by  
162 finger-like membrane processes. The fingers of one cell touch, or invaginate into, the opposing  
163 cell (Figure 2B) and the contact surfaces are sealed by tight junctions (Figure 2C, D).  
164 Interestingly, we observed that vesicles often accumulated at the base of these processes.

165 From a single section it is impossible to establish whether the lumen is continuous or  
166 divided into separate chambers. The 3D reconstruction (Figure 2E, Video Figure 2F, Suppl. Video  
167 S1) revealed that the transversal finger-like processes (Figure 2A) were sections of structures  
168 resembling the bulkheads of a boat. The bulkheads consisted of two parts, each contributed by  
169 the apical surface of one of the two adjacent cells which formed a ridge-shaped process (see 3D  
170 model Figure 2F, Video Figure 2F, Suppl. Video S1). Importantly, the two ridges were sealed by  
171 tight junctions which followed an unusual T-shape, with the horizontal bar representing the  
172 junctions longitudinal along the tube and the vertical bar the junctions extending along the

173 ridgeline (see scheme in Figure 2E, Video Figure 2F, Suppl. Video S1). The EM data are  
174 consistent with the presence of ZO-1 structures in the stripes crossing the lumen (Figure 1B). In  
175 some cases, the opposing processes are not precisely aligned along the ridgeline but shifted,  
176 forming a wide tight junction contact belt (Figure 2B, 2E, bulkheads B1, 4). The bulkheads can  
177 come either from the bottom (Figure 2F, bulkhead B3) or the top of the tube (Figure 2B, 2E,  
178 bulkheads B1, 2, 4), but never intersect it completely, thus ensuring lumen continuity in the BC  
179 (Video Figure 2F, Suppl. Video S1). Consequently, from the 3D reconstruction of Figure 2B and  
180 Suppl. Video S1, one can appreciate that the lumen has a tortuous shape. This accounts for the  
181 impression that the F-actin fluorescent and bright-field stripes only partially cross the lumen  
182 (Figure 1D). The *quasi*-periodicity of the bulkheads can therefore explain the actin pattern  
183 observed by live-cell imaging (Figure 1D) and SMLM (Figure 1E).

184 Altogether, the EM analysis revealed that adjacent hepatocytes are physically connected  
185 not only along the tight junction belt but also within the lumen via repetitive transversal  
186 connections between the apical surfaces sealed by tight junctions. These apical structures can  
187 therefore account for the high density of F-actin visualized by light microscopy (Figure 1C-E).

### 188 **Transversal apical membrane structures form during BC lumen morphogenesis in embryonic** 189 **liver**

190 The repetitive pattern of bulkhead-like transversal connections could be a peculiar  
191 feature of the *in vitro* culture system, where the cells adhere to the same surface and are  
192 forced to form 2D layers. To verify that such organization has physiological relevance, we  
193 examined the ultrastructure of the nascent BC in the embryonic liver. Also here, EM on serial  
194 sections (Figure 3A, B) and 3D reconstruction of BC lumen (Figure 3C, D) in embryonic (E15.5)  
195 liver confirmed the existence of a bulkhead-like pattern of transversal connections. The lumen  
196 shape was even more complex than the one observed *in vitro*, due to the 3D organization of the  
197 tissue, with a higher degree of freedom for cell-cell contacts. Importantly, also *in vivo* the  
198 bulkheads did not divide the BC lumen into isolated chambers (Figure 3C, D). These results  
199 validate the structural organization of the hepatocytes observed *in vitro* and support the

200 conclusion that the two opposing apical surfaces are physically linked by transversal  
201 connections.

## 202 **Conversion of hepatocyte polarity into simple apico-basal polarity**

203 The formation of bulkhead-like apical processes *in vitro* and *in vivo* could be a specific  
204 feature of the tubular lumen of hepatocytes, as they were never described in simple epithelia,  
205 including cysts *in vitro*. In the developing liver, hepatoblasts can give rise either to hepatocytes  
206 generating BC or bile duct cells forming a tubular epithelium. When cultured *in vitro*, bile duct  
207 cells form 3D cysts with a spherical lumen (Huch et al., 2013; Prior et al., 2019; Tanimizu et al.,  
208 2007). Our aim was to exploit primary hepatoblasts to convert one type of cell polarity into  
209 another. To this end, we established an *in vitro* system that can recapitulate both hepatocyte  
210 and simple apico-basal polarity simultaneously, side by side in the same culture. To neutralize  
211 the effect of the ECM (Tanimizu et al., 2004, 2007) and focus on intrinsic cellular factors  
212 regulating the lumen shape, we used primary hepatoblasts under the same culture conditions.  
213 By optimizing the culture conditions (see Methods), the hepatoblasts that differentiated into  
214 hepatocytes formed branched BC-like structures at the bottom of the well (Figure 4A), whereas  
215 the bile duct (Sox9-positive) cells formed 3D cysts that rose from the bottom into the medium  
216 (Figure 4A', A'').

217 Having achieved an *in vitro* system that recapitulates the two types of cell polarity and  
218 lumen morphology, we set to identify genes required for these processes using an RNAi  
219 approach. To date, only a few genes have been associated with the regulation of hepatocyte  
220 lumen morphology (*Mark2/Par1b*, *Pard3*, *Stk11/Lkb1*, *Cdc42*) in hepatocyte cell lines, or  
221 primary hepatocytes (Cohen et al., 2004b; Fu et al., 2010; Wang et al., 2014; Yuan et al., 2009).  
222 We performed a focused screen on 25 candidate genes, including the aforementioned ones,  
223 encoding key regulatory components of cell polarity (Table S1): apical junction formation (e.g.  
224 *Pard3*, *Tjp1*, *Cldn2*), cytoskeleton regulation (e.g. *Mark2/Par1b*, *Stk11/Lkb1*, *Cdc42*) and  
225 polarized trafficking (e.g. *Rab11a*, *Rab35*, *Cdc42*). For the screen, we designed independent  
226 siRNA duplexes using customized software, selected six siRNAs with the highest functionality  
227 score per target gene and synthesized them with modifications to enhance their stability



228 (Farzan et al., 2017; Reynolds et al., 2004). Cells were transfected with the siRNAs and after 5  
229 days in culture stained for F-actin, which is enriched at the apical domain (Figure 1C, D, 4A). Hit  
230 candidates were those yielding a penetrant lumen phenotype with a minimum of two siRNAs.  
231 Silencing of Ocln (Figure S4A) and Tjp1 (Figure S4B) yielded a loss of polarity, with de-localized  
232 F-actin and decreased intensity of the apical marker CD13 due to the absence of lumina.  
233 Remarkably, out of the 25 genes screened, silencing of Cdc42 and Rab35 did not compromise  
234 cell polarity, as judged by the localization of CD13 and ZO-1, but altered lumen morphology  
235 (Figure S4C, 4B, S4D). Cdc42 silencing caused dilated spherical lumina (Figure S4D, Table S1),  
236 thus reproducing the phenotype reported in liver-specific Cdc42 KO mice (Yuan et al., 2009),  
237 and validating our approach. However, Rab35 knock-down yielded the most striking phenotype,  
238 leading to the formation of large cyst-like structures (Figure 4B, S4D, and Video Figure 4B')  
239 instead of BC as in control (Luciferase, siLuc). Optical sectioning and 3D reconstruction showed  
240 that the lumen of these cysts was connected with the BC formed by the neighbouring  
241 hepatocytes (Figure 4C), indicating that the cells indeed displayed the two types of polarity side  
242 by side, reminiscent of the organization of the peri-portal zone of liver tissue (Antonioni et al.,  
243 2009; Müsch, 2018; Ober and Lemaigre, 2018). Rab35 is a versatile small GTPase, involved in  
244 numerous cellular processes related to cell polarity and lumen formation (Klinkert and Echard,  
245 2016). Given the strength of the phenotype and because Rab35 had no previous connection to  
246 hepatocyte lumen morphology, we decided to focus on this gene and explore its function in  
247 more detail.

#### 248 **Rab35 is rate-limiting for the generation of hepatocyte lumina**

249 To begin with, we validated the specificity of the Rab35 RNAi phenotype. First, out of six  
250 designed siRNAs, five yielded Rab35 mRNA down-regulation above 50% after 96h and showed  
251 various degrees of lumen alteration. The three siRNAs (siRab35 #2, #4, #5) that consistently  
252 yielded the strongest phenotype reduced Rab35 mRNA (Figure S4F) and protein level more than  
253 70% (Figure 4D). Second, Rab35 was enriched in the apical surface of hepatocytes as well as  
254 lateral plasma membrane and cytoplasmic vesicles (Figure 4E), consistent with the reported  
255 endosomal localization (Klinkert et al., 2016; Kouranti et al., 2006). Upon silencing, this staining

256 was markedly reduced (Figure 4E). Third, expression of exogenous EGFP-tagged Rab35 yielded a  
257 similar pattern of localization (Figure 4F). Interestingly, Rab35 was not only enriched apically  
258 but also present on the transversal connections which were dynamically remodelled as the  
259 apical lumen expanded anisotropically (Figure 4F). Fourth, to further confirm that loss of Rab35  
260 was specifically responsible for the observed phenotype, we performed a rescue experiment  
261 whereby we restored the expression of Rab35 by viral-mediated transduction of human Rab35,  
262 which is resistant to siRab35 #4. We quantified the effect of Rab35 knock-down on lumen  
263 morphology by measuring the radius of individual lumina in the control and knock-down  
264 conditions, and plotting the frequency distribution of values. There was a consistent shift  
265 towards larger lumina in the knock-down conditions by the three siRNA duplexes targeting  
266 Rab35 mRNA (Figure 4G). Importantly, in control conditions we could barely observe lumina  
267 with radius larger than 6  $\mu\text{m}$ , whereas upon Rab35 silencing  $\sim 20\text{--}25\%$  of lumina had a radius  $>$   
268 than 6  $\mu\text{m}$ . Adenovirus-mediated expression of EGFP-tagged Rab35 was able to rescue the  
269 Rab35 silencing phenotype, shifting the distribution of lumen radius towards the control,  
270 whereas expression of EGFP had no affect (Figure 4H). Altogether, these results suggest that  
271 Rab35 is rate-limiting for the generation of BC hepatocyte lumina and its depletion caused the  
272 formation of cyst-like structures similar to those formed by bile-duct cells *in vitro*.

### 273 **Silencing of Rab35 causes the loss of transversal apical bulkheads and formation of spherical** 274 **cysts via a cell self-organization process**

275 To gain insights into the mechanism of Rab35 depletion on lumen morphogenesis, we  
276 imaged LifeAct-EGFP expressing cells transfected with Rab35 or Luciferase siRNA as control by  
277 live-cell time-lapse microscopy, as described above (Figure 1D, Figure S1). Whereas normal and  
278 control differentiating hepatoblasts transfected with Luciferase siRNA formed elongated  
279 lumina, upon Rab35 siRNA transfection, they generated spherical lumina, initially between two  
280 cells (Figure 5A, Video Figure 5A). With time, we could observe major cell rearrangements,  
281 whereby cells moved and reshaped their apical surface leading to the fusion of lumina and the  
282 formation of 3D multi-cellular cysts (Figure 5B, Video Figure 5B), as shown in Figure 4C. Also in  
283 this case, such a re-organization was not a result of cell division, as for other cysts formed *in*

284 *vitro* (Jewett and Prekeris, 2018), but rather by a self-organization process. A spherical  
285 expansion of the lumen occurred only in the cases where the cells failed to form the striped  
286 actin pattern indicative of the bulkheads typically present in BC lumina (Figure 5A, B, Video  
287 Figure 5A, 5B). Conversely, the elongated lumina that still formed always contained the  
288 transversal actin stripes. Careful inspection of the live cell imaging videos (e.g. Video Figure 1D,  
289 5B) suggested that the disappearance of the transversal bulkheads precedes the formation of a  
290 spherical lumen.

291 To corroborate the loss of the bulkheads in the spherical lumina, we examined their  
292 ultra-structure by EM on serial sections and 3D reconstruction of the entire lumen volume. We  
293 focused on large cyst-like lumina formed by several cells. Individual EM sections of a cyst-like  
294 lumen between five cells showed that the bulkheads that are normally present in the BC lumina  
295 were absent (Figure 5C). This was confirmed by the 3D model of the lumen based on rendering  
296 plasma membranes and tight junctions (Figure 5D). In addition, the tight junctions between the  
297 cells did not protrude into the lumen, as seen at the sagittal cross section of the 3D model  
298 (Figure 5D).

299 These results suggest that down-regulation of Rab35 in differentiating hepatoblasts  
300 causes the loss of the transversal bulkheads and converts tubular BC lumina into cyst-like  
301 structures.

### 302 **Down-regulation of Rab35 affects hepatocyte differentiation**

303 The cyst-like structures generated upon Rab35 KD by differentiating hepatoblasts are  
304 reminiscent of the cysts formed by Sox9-positive primary bile duct cells *in vitro* (Figure 4A). This  
305 raises the question of whether loss of Rab35, in addition to modifying the cell polarity  
306 phenotype, also causes a change in the commitment of the hepatoblasts towards bile duct cells  
307 or, alternatively, a change in the hepatocyte cell fate. To address this question, we  
308 characterized the transcriptional profile of cells upon Rab35 silencing by RNA-seq analysis. We  
309 found 313 differentially transcribed genes in cells transfected with Rab35 siRNA compared to  
310 Luc siRNAs as control (Log<sub>2</sub> fold change cut-off 0.5, p-value cut-off 0.01). Strikingly, mature  
311 hepatocyte marker genes, e.g. *Serpina1*, *Ces1c*, *Pck1*, *Cyp3a11*, were down-regulated in

312 siRab35-transfected cells (Figure 6A, negative Log<sub>2</sub> fold change, magenta), whereas genes  
313 related to the apico-basal polarity in epithelial cells and typically not expressed in hepatocytes,  
314 were up-regulated (Figure 6A, positive Log<sub>2</sub> fold change, green), e.g. *Ap1m2*, *Mal*, *Grhl2* and  
315 *Rab25* (Fölsch et al., 1999; Ramnarayanan et al., 2007; Senga et al., 2012). *Grhl2* was identified  
316 by Senga et al. (2012) as a bile duct cell-specific transcription factor, arguing that the cells  
317 acquire features of bile duct cells. This conclusion was confirmed by the finding that bile duct  
318 cells markers *Tacstd2* (*Trop2*) and *Krt19* (Segal et al., 2019) were also up-regulated. We verified  
319 the expression of various markers at the protein level by immunofluorescence specifically in the  
320 cells forming the cysts resulting from Rab35 silencing (Figure 6B). Some of the cells in the cysts  
321 continued to express Albumin (albeit at lower level), retained the accumulation of glycogen  
322 granules in the cytoplasm and did not have cilia (Figure 5C), suggesting that these hepatoblasts  
323 differentiated into hepatocytes and then changed cell fate towards bile duct cells. However,  
324 other cells were *Krt19*<sup>+</sup>/*Alb*<sup>-</sup> (outlined in Figure 6B), suggesting activation of the bile duct cells  
325 program in hepatoblasts. Yet, these cells did not express *Sox9*, an early marker of bile duct cells  
326 required for cilia formation (Antoniou et al., 2009; Poncy et al., 2015), indicating that they do  
327 not acquire a complete bile duct cell fate.

328 To understand to what extent Rab35 silencing alters the differentiation of hepatocyte  
329 progenitor cells, we compared the transcriptome of siRNA transfected cells (control and Rab35  
330 siRNA, from Figure 6A) with that of three cell types, hepatoblasts, adult hepatocytes and bile  
331 duct cells. For this purpose, we performed gene set enrichment analysis (GSEA), a commonly  
332 used method for interpreting gene expression data (Mootha et al., 2003; Subramanian et al.,  
333 2005). GSEA calculates a so-called enrichment score, which reveals how strongly a given gene  
334 set is overrepresented among the highly-ranked genes in a list. When plotting the enrichment  
335 score, a rising curve at the left side of the graph indicates an overrepresentation at the top of  
336 the ranked gene list. In our analysis, all three ranked lists were generated using DESeq2 (Love  
337 et al., 2014) and reflect the gene expression profiles comparison between one cell type versus  
338 the other two. In the first step, we used GSEA to investigate the overrepresentation of the  
339 genes down-regulated upon Rab35 silencing in the three aforementioned cell types. The  
340 resulting enrichment plots (upper row of Figure 6C) clearly show the overrepresentation of the

341 investigated gene set in adult hepatocytes. In hepatoblasts, only a slight overrepresentation  
342 was detected, whereas in bile duct cells no enrichment was observable. Next, we repeated the  
343 analysis using the set of genes up-regulated upon Rab35 silencing. Interestingly, the resulting  
344 plots (the lower row of the Figure 6C) showed an overrepresentation of the investigated gene  
345 set in bile duct cells, while hardly any or no enrichment in the other two cell types could be  
346 detected. This confirms a positive correlation of gene expression profiles between  
347 transcriptomes of siRab35-transfected and bile duct cells.

348 In summary, the results show that silencing of Rab35 changed the transcriptional profile  
349 of the hepatoblasts, suggesting both a change from the default (*in vitro*) hepatocyte cell  
350 commitment towards the bile duct cell fate, but also a change in cell fate, through the  
351 transition from differentiated hepatocytes towards bile duct cells. Such a transition is not all-or-  
352 none, as in some cells it is more efficient than in others, and none acquires a complete bile duct  
353 cell fate.

#### 354 **Re-engineering of liver tissue architecture by silencing of Rab35 *in vivo***

355 The specific polarity of hepatocytes is a key element for the organization of liver tissue,  
356 particularly the formation of the BC network which is very distinct from other simple epithelia,  
357 including the bile duct. The change in cell polarity caused by the silencing of Rab35 in  
358 differentiating hepatoblasts *in vitro* provides a means to attempt to re-engineer liver tissue by  
359 modifying the BC lumen and cell self-organization *in vivo*. Therefore, we set to modify the  
360 polarity of hepatocytes by Rab35 silencing in the developing liver *in vivo*. The complete loss of  
361 Rab35 in a KO mouse line is embryonically lethal (Dickinson et al., 2016), presumably due to  
362 cytokinesis defects (Kouranti et al., 2006). To circumvent this problem and deplete Rab35 as *in*  
363 *vitro*, we took advantage of lipid nanoparticles (LNP) developed for human therapeutics,  
364 enabling the specific delivery of siRNAs to hepatocytes in the liver (Akinc et al., 2010; Zeigerer  
365 et al., 2012). To target the E13.5 embryonic liver, we used a method for *in utero* injection via  
366 vitelline vein (Ahn et al., 2018). We first validated the technique on mice expressing membrane-  
367 targeted GFP. We performed the *in utero* injection of LNP-GFP or Luciferase (as control) siRNA  
368 in E13.5 embryos and collected the livers after 4 days of development (Figure S7A). The GFP

369 signal in the liver was markedly and homogeneously reduced in hepatocytes, whereas different  
370 cell types, e.g. hematopoietic cells were unaffected (Figure S7B).

371 We next formulated the Rab35 siRNA validated *in vitro* (Figure 4D, G, H) and Luciferase  
372 siRNA into LNP and injected them into embryonic livers as described above. We analysed the  
373 effect on liver tissue using a pipeline of immunostaining, deep tissue imaging and 3D  
374 reconstruction (Morales-Navarrete et al., 2015) (Figure 7A). As in control liver, E17.5 livers  
375 injected with LNP-Luciferase siRNA developed normal elongated BC tubules formed by two  
376 adjacent hepatocytes (Figure 7A'). Strikingly, LNP-Rab35 siRNA-injection induced the formation  
377 of large tubular structures in the liver parenchyma (Figure 7A''). As these structures are  
378 remarkably similar to bile duct at this developmental stage, we needed to rule out that they  
379 may be formed by bile duct cells. First, the tubular structures are present throughout the  
380 parenchyma and distant from the portal area where the bile ducts are located. Second, staining  
381 with HNF4a and Sox9 confirmed that the cells forming the tubules expressed hepatocyte  
382 markers and were not fully differentiated bile duct cells (Figure 7A''' Suppl. Figure S7C), similar  
383 to the cells *in vitro* (Figure 5C, 6B). Importantly, the organization of the tubules suggested a  
384 change in cell polarity. Whereas in control tissue individual hepatocytes formed multiple lumina  
385 per cell (characteristic of hepatocyte polarity), the cells forming the large tubular structures  
386 polarized with a single apico-basal axis and shared the same apical lumen (Figure 7B, see  
387 below).

388 To demonstrate that the large tubular structures are not isolated but part of an  
389 interconnected luminal network, we performed 3D reconstruction of apical surfaces (marked  
390 with CD13) in 100  $\mu\text{m}$ -thick sections (Figure 7B). In normal and LNP-Luciferase siRNA injected  
391 livers, CD13 had the typical appearance of 3D BC network (Figure 7C, Video Figure 7CD). In  
392 contrast, in Rab35 siRNA- injected livers, the 3D reconstruction revealed profound changes in  
393 lumen morphology in proximity to the central vein, i.e. distant from peri-portal bile duct (Figure  
394 7D, Video Figure 7CD). The quantification from the reconstructed lumina showed a general  
395 increase in lumen radius (Figure 7E), similar to the one observed *in vitro* (Figure 4G).  
396 Remarkably,  $30 \pm 11$  % of lumina had lumen radii significantly larger than the BC in the control

397 livers. 3D reconstruction of segments of large tubular structures confirmed that the tubes were  
398 formed by multiple cells, with an average of 4 cells sharing the same lumen (Figure 7F, G; Video  
399 Figure 7F). These results suggest that we succeeded in re-engineering liver tissue structure by  
400 down-regulation of Rab35 *in vivo*. This resulted in the modification of the cell polarity of  
401 hepatocytes which, instead of forming BC, self-organized into tubular epithelial structures  
402 similar to bile ducts.

## 403 **Discussion**

404         The mechanisms underlying the specific polarity of hepatocytes and the formation of BC  
405 are poorly understood, and different models including asymmetric cell division have been put  
406 forward (Fu et al., 2011; Li et al., 2016; Müsch, 2018; Ober and Lemaigre, 2018; Tanimizu and  
407 Mitaka, 2017). In the embryonic liver however, an almost fully connected BC network is  
408 generated despite hepatoblasts gradually ceasing to proliferate (Tanimizu et al., 2016; Yang et  
409 al., 2017, Figure 7C). Moreover, primary mature hepatocytes in culture can form a tubular BC  
410 network without significant cell division (Fu et al., 2010). In this study, we looked for a  
411 mechanism that could explain the peculiar tubular shape of hepatocyte apical lumina. We  
412 discovered the existence of very specific extensions of the apical membrane sealed by tight  
413 junctions in the lumen between two adjacent hepatocytes that fulfil the criteria for enabling  
414 the anisotropic elongation of the nascent BC tubule. The best analogy we could find for these  
415 structures are the bulkheads of of boats, ships and planes. Bulkheads provide structural stability  
416 and rigidity, strengthening the structure of elongated vessels. Here, the apical bulk-heads are  
417 *quasi*-periodic and can provide mechanical coupling between the apical surfaces of  
418 hepatocytes, which remain “clumped” together as the lumen grows. In their absence (upon  
419 Rab35 down-regulation), the apical surfaces of hepatocytes lose their anisotropic growth and  
420 the lumina convert from elongated into spherical, typical of simple epithelial cells. Our data  
421 thus suggest that mechanical coupling between hepatocytes underlies the formation of BC and  
422 provide unprecedented insights into the longstanding problem of epithelial morphogenesis of  
423 liver parenchyma.

424 In our culture setup, primary hepatoblasts differentiate into hepatocytes and  
425 recapitulate BC formation without cell division, as evidenced by live-cell imaging experiments.  
426 Hepatocytes initially form lumina between cell doublets. The lumina are closed and have no  
427 outlet to drain the inner fluid. Therefore, the increase in osmotic pressure resulting from the  
428 osmolytes pumped through the apical membrane should lead to a spherical lumen, not a  
429 tubular one. From the physics of thin-shells, formation of a tubular lumen with inner pressure  
430 and no outlets requires anisotropy of surface tension and/or rigidity of the wall (Berthoumieux  
431 et al., 2014; Landau and Lifshitz, 1986). The bulkheads are structural elements which can  
432 provide such anisotropy and mechanical stability to the elongating lumen under inner pressure.  
433 The position of the bulkheads could be determined by mechano-sensing mechanisms coupled  
434 to the tension and local curvature through the actin cortical mesh (Meyer et al., 2020). The  
435 bulkheads were detected in the embryonic liver, suggesting that they are not a cell culture  
436 artefact but have physiological relevance. The elongation of the apical lumen entails also the  
437 movement and re-arrangement of cell-cell contacts which is accompanied by the formation of  
438 new bulkheads (Figure 1D, S1C). Consistently, in the absence of bulkheads, lumina grow  
439 isotropically, generating cysts instead of rows of hepatocytes (Figure 5A and 5B).

440 The discovery of the apical bulkheads of hepatocytes focuses the attention on the  
441 mechanism underlying their formation. We obtained several cues from the morphological  
442 analysis and functional screen by RNAi. First, the bulkheads are characterized by a T-shaped  
443 arrangement of tight junctions which seal the two halves of the bulkheads (Figure 1B, 2F). To  
444 our knowledge, this organization is unprecedented in polarized cells. It is conceivable that the  
445 T-arrangement of the tight junctions could originate from the junctions longitudinal along the  
446 tubule (horizontal bar in the T) and zip-up along the ridgeline (vertical bar of the T), either from  
447 the bottom or from the top. Second, given that the tight junctions are connected to actin  
448 filaments, it is no surprise that the bulkheads contain F-actin transversally to the lumen  
449 elongation. The presence of F-actin in the bulkheads would introduce anisotropy in apical  
450 surface tension, leading to the formation of a tubular instead of spherical lumen. Live-cell  
451 imaging showed that the F-actin structures are dynamic and adaptable, and therefore, fit the  
452 requirements of a growing, branching and fusing BC network *in vivo*. The assembly of the



453 bulkheads would require that membrane is deposited to the apical surface which may be  
454 delivered by localized secretion or recycling from the endosomal system. Consistent with such a  
455 trafficking requirement, we observed the accumulation of vesicles at the base of the bulkheads.  
456 Third, by a focused RNAi screen for established regulators of cell polarity we found that the  
457 small GTPase Rab35, a regulator of endosomal recycling (Klinkert et al., 2016; Kouranti et al.,  
458 2006; Mrozowska and Fukuda, 2016), is required for the formation of the apical bulkheads and  
459 hepatocyte apical lumen shape.

460 In epithelial cells, Rab35 has been localized to the apical and lateral plasma membrane  
461 (Kouranti et al., 2006) and functionally associated with polarized trafficking and actin  
462 organization (Klinkert and Echard, 2016). In polarizing hepatoblasts, Rab35 is also enriched at  
463 the apical plasma membrane where the bulkheads are formed. However, whereas down-  
464 regulation of Rab35 in MDCK cysts led to an inversion of polarity (Klinkert et al., 2016), it did  
465 not cause a loss or inversion of polarity in hepatoblasts, but led to the disappearance of the  
466 bulkheads and the conversion from hepatocyte polarity to simple apico-basal polarity. These  
467 results suggest that Rab35 is rate-limiting for the formation of bulkheads in hepatocytes. Based  
468 on the previous work on Rab35 function (Klinkert and Echard, 2016; Kouranti et al., 2006), we  
469 envision that it could regulate the intracellular distribution and function of apical recycling  
470 endosomes to deliver transmembrane proteins, e.g. junction components, at the site of  
471 bulkheads initiation and/or growth. The presence of clusters of vesicles at the base of the  
472 bulkheads as visualized by EM supports this view. However, Rab35 is also known to coordinate  
473 membrane trafficking with the organization of the actin cytoskeleton (Chua et al., 2010; Klinkert  
474 and Echard, 2016). Therefore, Rab35 could regulate the nucleation and/or dynamics of the F-  
475 actin at the bulkheads. Testing these models will require a number of approaches, including  
476 taking advantage of previous studies on genes regulating hepatocyte polarity. Lkb1 was shown  
477 to be part of a molecular pathway including cAMP-Epac-MEK-AMPK regulating BC network  
478 formation (Fu et al., 2010, 2011; Homolya et al., 2014; Woods et al., 2011). Pard3, Par1b and  
479 various Claudins were reported to have an effect on the hepatocyte polarity, when depleted in  
480 different hepatocyte cell lines (Can10, HepG2, and WIFB9) and primary adult hepatocytes  
481 (Grosse et al., 2013; Slim et al., 2013; Son et al., 2009; Wang et al., 2014). The function of these

482 genes should thus be re-visited in the context of the bulkheads and anisotropy of lumen  
483 elongation. It will be important to explore the role of the actin cytoskeleton, for example via a  
484 variety of drugs, under condition that they do not disrupt polarity or generate pleiotropic  
485 cytotoxic effects. The role of Rab35 may be mediated by its known effectors regulating the  
486 actin cytoskeleton (e.g. MICAL1 and OCRL; Chaineau et al., 2013; Dambournet et al., 2011;  
487 Frémont et al., 2017) or unknown hepatocyte-specific effectors. In this respect, the  
488 transcriptomics analysis revealed a wide number of candidate genes differentially expressed in  
489 hepatocytes vs. bile duct cells, and up- or down-regulated upon Rab35 silencing. Dissecting the  
490 mechanisms of bulkheads formation will thus necessitate a molecularly-broad experimental  
491 strategy.

492 Remarkably, silencing of Rab35 not only changed the lumen morphology of polarizing  
493 hepatoblasts *in vitro*, but also allowed us to re-engineer the organization of the developing liver  
494 parenchyma which displayed a striking increase of large tubular structures resembling bile  
495 ducts. This means that we succeeded in converting the polarity of hepatocytes into simple  
496 apico-basal polarity also *in vivo*. Surprisingly, Rab35 depletion also altered the commitment of  
497 hepatoblasts towards bile duct cells and/or switched hepatocytes towards the bile duct cell  
498 program, although incompletely. Some cells retained hepatocyte features, whereas others did  
499 express bile duct cell markers, but not Sox9 required for cilia formation. We cannot determine  
500 whether Rab35 down-regulation directly poises the hepatoblasts towards the bile duct cell fate  
501 or this is a consequence of the change in cell polarity. One possibility is that the lumen  
502 morphology is sensed by the polarizing hepatoblasts, e.g. via a mechanosensing pathway that  
503 feeds back on the cell transcriptional program. Interestingly, in retinal neuroepithelia and  
504 pancreas, cell fate decision could be manipulated by changing the size of the apical domain,  
505 that was reflected on the activity of the Notch signalling pathway (Clark et al., 2012; Löff-Öhlin  
506 et al., 2017). Besides Rab35, other well established cell polarity proteins, Crb3 and Cdc42, can  
507 directly or indirectly influence the cell fate of progenitor cells (Szymaniak et al., 2015, Kesavan  
508 et al., 2009). While Crb3 regulates the cell fate of airway epithelial cells by directly interacting  
509 with components of the Hippo pathway (Szymaniak et al., 2015), Cdc42 plays a cell non-

510 autonomous role in the specification of pancreatic progenitors by controlling their surrounding  
511 microenvironment.

512 Our data provide yet another example for the complex interplay between cell polarity,  
513 cell fate decision and mechanics in tissue self-organization, and provide new insights into liver  
514 tissue organization both in development and in the adult. The apical bulkheads appear to be a  
515 distinctive feature of the hepatocytes and the BC network. The dynamics of the apical  
516 bulkheads and the role of actin filaments and associated factors will be crucial to elucidate the  
517 interplay between cellular morphogenesis and cell and tissue mechanics. Additionally, the  
518 bulkheads could serve as hot-spots of contractility to facilitate bile flux, as shown *in vivo* (Meyer  
519 et al., 2017; Watanabe et al., 1991). The bulkheads in ships can also act as (semi)watertight  
520 compartments to prevent seeping of water to other parts of the ship. Similarly in the BC, they  
521 could act as valves ensuring directionality of bile flux in a non-peristaltic contractility.  
522 Understanding their structure and function will thus provide novel information on the role of  
523 the acto-myosin system in the regulation of bile flux in the BC network.

524

## 525 **Acknowledgements**

526 We are grateful to Arnaud Echard for discussions and sharing various reagents. We thank Drs.  
527 Meritxell Huch, Elisabeth Knust, Kai Simons, Ivan Baines, and Janelle Lauer for stimulating  
528 discussions and critical reading of the manuscript. We acknowledge Sandra Segeletz for sharing  
529 her expertise in recombinant adenovirus production and live-cell imaging and Alexandra  
530 Kalaidzidou for visualization artwork. We acknowledge the DRESDEN-concept Genome Center  
531 for the bulk RNA-sequencing service and for the support of the Light Microscopy Facility, a Core  
532 Facility of the CMCB Technology Platform at TU Dresden. We would like to thank the following  
533 Services and Facilities of the Max Planck Institute of Molecular Cell Biology and Genetics for  
534 their support: Antibody Facility, Biomedical Services, Electron Microscopy Facility, Light  
535 Microscopy Facility, Protein Expression, Purification and Characterization (PEPC) Facility, and  
536 Scientific Computing Facility, particularly Lena Hersemann and Noreen Walker.

537 This research was financially supported by the German Federal Ministry of Research and  
538 Education (BMBF) (LiSyM, grant number 031L0038), the European Research Council (ERC)  
539 (grant number 695646), Deutsche Forschungsgemeinschaft (DFG, German Research

540 Foundation) under Germany's Excellence Strategy – EXC-2068– 390729961– Cluster of  
541 Excellence Physics of Life of TU Dresden and the Max Planck Society (MPG).

#### 542 **Author contributions**

543 Conceptualization, M.Z., L.B. and Y.K.; Methodology, L.B., J.D. and S.S.; Investigation, L.B., U.R.,  
544 J.D., S.S., J.I.V., C.F. and H.R.; Software, E.G., H.M-N. and J.I.V; Formal analysis, L.B., U.R., E.G.,  
545 H.M-N., J.I.V, C.F. and Y.K.; Resources, T.Z., E.S., T.P., V.K. and M.V.; Visualization, L.B., U.R.,  
546 E.G., M.V., J.I.V., H.M-N., C.F. and Y.K.; Validation, L.B.; Writing – Original draft, L.B.; Writing –  
547 Review and Editing, M.Z. and Y.K.; Funding acquisition, M.Z.

548

#### 549 **Declaration of interests**

550 The authors declare no competing interests.

551

#### 552 **Figure titles and legends**

553

554 **Figure 1: Lumen morphogenesis in hepatocytes is accompanied by specific actin structures**  
555 **that interconnect the two lumen-forming cells (See also Figure S1)**

556 **A)** Schematic overview of primary Dlk+ hepatoblasts in Matrigel sandwich culture  
557 differentiating into hepatocytes and recapitulating BC formation.

558 **B)** Differentiated hepatocytes form branched interconnected BC lumina. Immunofluorescence  
559 microscopy images of differentiated hepatocytes stained for F-actin with Phalloidin-Alexa488,  
560 and for apical markers CD13 and ZO-1. Scale bar: 10  $\mu$ m.

561 **C)** *In vitro* differentiated hepatocytes express mature hepatocyte markers and down-regulate  
562 the hepatoblast marker Dlk. Heatmap comparing the expression of selected hepatocyte marker  
563 genes in primary Dlk+ hepatoblasts (Hepatoblasts), *in vitro* differentiated hepatocytes (Diff.  
564 hepatocytes) and control mature hepatocytes isolated from adult mouse livers (Mature  
565 hepatocytes). RNA-seq experiment in 4 biological replicates.

566 **D)** Images from live-cell time-lapse microscopy documenting the formation of BC between two  
567 differentiating hepatoblasts expressing LifeAct-EGFP. During imaging, the extending tubular  
568 lumen displayed a bulge at 27h from the start of imaging, which was subsequently "re-  
569 absorbed". The insert **D'** shows individual frames taken each 10 min from this timepoint,  
570 documenting the recovery of the tubule (white star). Note the transverse striped pattern in  
571 brightfield and actin channels, which is apparent when the lumen is tubular but not observed  
572 within the bulge. Scale bar: 10  $\mu$ m. See also Video Figure 1D (Scale bar: 10  $\mu$ m).

573 **E)** Single-molecule localization microscopy (SMLM) image of a lumen between two  
574 differentiated hepatocytes, actin labelled with Phalloidin-Alexa647. Note the transverse striped  
575 actin pattern. Scale bar: 5  $\mu\text{m}$ .

576

577 **Figure 2: Ultra-structural analysis reveals a bulkhead-like pattern of transversal structures**  
578 **sealed by T-shaped tight junctions in the BC lumen**

579 **A)** Electron microscopy image of a BC branched between three cells. Longitudinal section of *in*  
580 *vitro* differentiated hepatocytes. GG: glycogen granules. The outlined region is shown in panel  
581 B. Scale bar: 5  $\mu\text{m}$ .

582 **B)** Section of BC formed by two cells from a series of longitudinal 90-nm sections shown in Bi-  
583 Biv. The highlighted regions with transversal membrane connections are shown in the panel **C**  
584 and **D**. The membrane connections are not visible in every section (**Bi-Biv**). Scale bar: 1  $\mu\text{m}$ .

585 **C) and D)** Detailed view of the outlined regions in panel **B**. Membrane connections are formed  
586 by apical surfaces of both cells lining the BC and include the tight junctions (TJ, arrows). Vesicles  
587 (V) are often observed to accumulate in the vicinity of the connections. Scale bar: 1  $\mu\text{m}$ .

588 **E)** 3D reconstruction of serial sections in **B (Bi-Biv)** based on apical plasma membranes and tight  
589 junctions rendering. The cytoplasm of the lumen-forming cells is in green and blue, the tight  
590 junctions are highlighted in red. See also Suppl. Video S1.

591 **F)** Simplified model of BC based on the 3D reconstruction in **E** with periodic bulkhead-like  
592 membrane connections formed from the top or the bottom of the lumen (arrowheads). The  
593 tight junctions (red) have a T-shape, with the junctions longitudinal along the tube connected  
594 with the junctions extending along the ridgeline within each bulkhead. Uninterrupted flow  
595 within the lumen between bulkheads is shown with a dotted line. See also Video Figure 2F.

596

597 **Figure 3: Transversal apical membrane structures form during BC lumen morphogenesis in**  
598 **embryonic liver**

599 **A) and B)** Electron microscopy images of two serial sections of a forming BC in a E15.5 liver,  
600 surrounded by tight junctions (white arrows). The lumen of the two adjacent hepatocytes is  
601 outlined in white. The black arrows point to the tight junctions within the bulkhead-like  
602 membrane connections B1 and B2. Scale bar: 500 nm.

603 **C) and D)** 3D model of the lumen in A. and B., based on lumen surface rendering on serial  
604 sections. At the left bottom side (dashed black line), the BC continues. White arrows indicate  
605 the bulkheads B1, B2 shown in A. and B., respectively. Scale bar: 500 nm.

606

607 **Figure 4: Conversion of hepatocyte polarity into simple apico-basal polarity (See also Figure**  
608 **S4)**

609 **A)** Validation of the culture system. A mixture of primary hepatoblasts and bile duct cells form  
610 BC and cysts under the same culture conditions. Images at different z-positions demonstrate  
611 that cysts grow in the z-direction (A', A''), while hepatocytes with BC form a cell-layer close to  
612 the well bottom. Cells stained for F-actin with Phalloidin-Alexa488. Scale bar: 10  $\mu\text{m}$ .  
613 Schematics represent XZ view.

614 **B)** Knock-down of Rab35 in differentiating hepatoblasts caused formation of cyst-like structures  
615 (B'), whereas cells treated with the control siRNA (siLuc) were unaffected and formed BC.  
616 Microscopy images of cells stained for F-actin with Phalloidin-Alexa488. Scale bar: 30  $\mu\text{m}$ . See  
617 also Video Figure 4B' (Scale bar: 30  $\mu\text{m}$ ).

618 **C)** 3D reconstruction of the cells treated with Rab35 siRNA show the variability of the  
619 phenotype from enlarged swollen lumina to spherical cyst-like structures growing in the z-  
620 direction (lumina stained with the apical marker CD13). The BC connected to the cyst,  
621 reminiscent of the organization of the peri-portal zone in liver tissue.

622 **D)** Three independent Rab35 siRNA duplexes down-regulate Rab35 protein levels by  $73\% \pm 3\%$   
623 ( $n = 3$ , error bars: SD). Representative Western blot and quantification of protein knock-down.

624 **E)** Microscopy images of differentiated hepatocytes treated with Luciferase or Rab35 siRNA  
625 stained with Rab35 antibodies (yellow). Rab35 localizes to the apical and lateral plasma  
626 membrane and cytoplasmic puncta. The levels of Rab35 are markedly reduced in the cyst-like  
627 structures formed upon Rab35 siRNA transfection.

628 **F)** Localization of exogenous EGFP-Rab35 in polarizing hepatoblasts. Scale bar: 10  $\mu\text{m}$ .

629 **G)** Histogram of the local lumen radius in control cells and cells treated with Rab35 siRNA  
630 estimated based on microscopy image analysis. Rab35 knock-down by three independent  
631 siRNAs results in the shift towards the lumina with larger radius ( $n= 3$  (with 4 images per  
632 condition), error bars: SEM).

633 **H)** The enlarged lumina phenotype in the cells treated with Rab35 siRNA is rescued by  
634 expression of human Rab35-EGFP from recombinant adenovirus. Frequency curve of the lumen  
635 radius (yellow) overlaps with the one of the control cells expressing EGFP only. EGFP alone does  
636 not affect the lumen enlargement caused by Rab35 knock-down (red). ( $n= 3$  (with 4 images per  
637 condition), error bars: SEM).

638

639 **Figure 5: Silencing of Rab35 causes the loss of the transversal apical membrane bulkheads**  
640 **and formation of spherical cysts via a cell self-organization process**

641 **A)** In the cells treated with Rab35 siRNA, the lumina tend to grow as spheres instead of  
642 elongating as tubes. Images from the live-cell time-lapse microscopy experiment showing two  
643 neighbouring differentiating hepatoblasts expressing LifeAct-EGFP under Rab35 siRNA  
644 conditions. The white star indicates the forming lumen between the two cells. Note that the

645 typical transverse striped actin pattern observed in the tubular BC is absent. Scale bar: 10  $\mu$ m.  
646 See also Video Figure 5A (Scale bar: 10  $\mu$ m).  
647 **B)** Multicellular cyst-like structures form by cell re-arrangements. Images from the live-cell  
648 time-lapse microscopy experiment. The cells self-organize in such a way that the three separate  
649 lumina (black star) eventually fuse into one large spherical lumen, in the absence of cell  
650 division. Scale bar: 10  $\mu$ m. See also Video Figure 5B (Scale bar: 10  $\mu$ m).  
651 **C)** EM analysis of a cyst-like lumen resulting from the Rab35 knock-down. Three serial  
652 longitudinal 90-nm sections of the lumen formed between five cells. The bulkheads typical for  
653 hepatocyte BC are absent in the lumen. Arrows indicate tight junctions. GG: glycogen granules.  
654 Scale bar: 5  $\mu$ m.  
655 **D)** A longitudinal view through the middle of a 3D model of the lumen based on rendering  
656 plasma membranes and tight junctions (red) on serial sections. The five cells forming the lumen  
657 are represented in different colours (cyan, violet, yellow, blue and green). Red arrows point to  
658 the tight junctions at which the cyst is cut open to reveal the sagittal view in (D).  
659 **E)** A sagittal view of the lumen. The lumen has a circular profile and tight junctions do not  
660 protrude into the lumen.

661

#### 662 **Figure 6: Down-regulation of Rab35 affects hepatocyte differentiation**

663 **A)** Volcano-plot showing up- and down-regulated genes upon Rab35 siRNA treatment  
664 compared to the control siRNA. The marker genes for hepatocytes are down-regulated  
665 (magenta, e.g. *Serpina1e*, *Ces1c*, *Pck1*, *Cyp3a11*), whereas genes typically not expressed in  
666 hepatocyte but in other epithelial cell types are up-regulated (green, e.g. *Ap1m2*, *Grhl2*, *Rab25*,  
667 *Krt19*).  
668 **B)** Immunofluorescence microscopy images of a cyst-like structure compared to the control  
669 cells. In the cyst, some cells are positive for Krt19 (white outline) and have almost no albumin  
670 expression. In the control, Krt19 is barely detected. Scale bar: 10  $\mu$ m.  
671 **C)** Enrichment plots from Gene set enrichment analysis (GSEA) to test whether differentially  
672 expressed genes in **A** are enriched in gene expression profiles of hepatocytes, hepatoblasts or  
673 bile duct cells. The down-regulated genes (magenta) are over-represented in hepatocytes,  
674 whereas the up-regulated genes (green) are enriched in the bile duct cell gene expression  
675 profile. P-values are included above the GSEA curve.

676

#### 677 **Figure 7: Silencing of Rab35 *in vivo* results in altered cell polarity and liver tissue architecture**

678 **(See also Figure S7)**

679 **A)** Immunofluorescence images of liver tissue collected 4 days after *in utero* injection of  
680 Luciferase (siLuc) and Rab35 (siRab35) siRNAs formulated into LNP via vitelline vein in E13.5

681 embryos. The square on the low magnification images (scale bar: 500  $\mu\text{m}$ ) shows where the  
682 high resolution image was taken (scale bar: 20  $\mu\text{m}$ ). Imaged areas are located in the liver  
683 parenchyma, devoid of bile duct cell marker Sox9. The inserts (scale bar: 20  $\mu\text{m}$ ) in panels **A'**  
684 and **A''** show the difference between BC and bile duct-like lumina in LNP-siRab35 injected liver.  
685 Panel **A'''** compares tubular lumina in the parenchyma to the bile duct lumina in the portal area  
686 (Sox9-positive).

687 **B)** Immunofluorescence images of liver tissues from **A** show examples of hepatocyte polarity in  
688 the control tissue (a single hepatocyte forms multiple lumina per cell) and simple apico-basal  
689 polarity in LNP-siRab35 injected liver (cell have a single apical domain oriented towards a  
690 shared lumen).

691 **C)** and **D)** 3D reconstruction of lumina labelled with an apical marker CD13 in 100  $\mu\text{m}$ -thick  
692 sections of liver tissue injected with LNP-siLuc (**C**) and LNP-siRab35 (**D**). Scale bar: 30  $\mu\text{m}$ . See  
693 also Video Figure 7CD.

694 **E)** Quantification of the lumen radius distribution based on the 3D reconstructions such as in C  
695 and D (n= 3, error bars: SEM).

696 **F)** 3D reconstruction of a tubule found in LNP-siRab35 injected livers shows lumen in green  
697 surrounded by multiple cells. See also Video Figure 7F.

698 **G)** Quantification of number of cells surrounding the lumen in relation to lumen radius and  
699 position along the tubule.

700

## 701 **Supplemental figure titles and legends**

702

### 703 **Figure S1 (Related to Figure 1): Live-cell video microscopy images of BC morphogenesis in** 704 **LifeAct-EGFP expressing cells**

705 **A)** A single polarizing differentiating hepatoblast forming multiple tubular lumina. Scale bar:  
706 10  $\mu\text{m}$ . See also Video Figure S1A.

707 **B)** BC network grows between neighbouring cells by fusion and branching (marked by star) of  
708 elongated tubular lumina. Scale bar: 10  $\mu\text{m}$ . See also Video Figure S1B.

709 **C)** A lumen formed between two cells starts growing spherical, but is later adjusted and  
710 continue to elongate as a typical BC lumen. Scale bar: 10  $\mu\text{m}$ . See also Video Figure S1C.

711

### 712 **Figure S4 (Related to Figure 4): Conversion of hepatocyte polarity into simple apico-basal** 713 **polarity**

714 **A)** Down-regulation of Occludin impairs the lumen formation in differentiating and polarizing  
715 hepatobalsts. Immunofluorescence images of cells stained for the apical marker CD13 and  
716 Occludin. Scale bar: 10  $\mu\text{m}$ .



717 **B)** Down-regulation of the tight junction protein ZO-1 impairs the lumen formation in  
718 differentiating and polarizing hepatoblasts. Immunofluorescence images of cells stained for ZO-  
719 1. Scale bar: 10  $\mu$ m.

720 **C)** Down-regulation of Cdc42 leads to spherical lumina instead of BC in polarizing hepatoblasts.  
721 The polarity is not perturbed, as apical markers CD13 and ZO-1 still localized to the formed  
722 lumina. Scale bar: 10  $\mu$ m.

723 **D)** Down-regulation of Rab35 leads to profound changes in lumen morphology of polarizing and  
724 differentiating hepatoblasts. The cells form multicellular structures with a shared lumen  
725 positive for apical markers CD13 and ZO-1. Immunofluorescence images of cells treated with  
726 three different siRNAs oligos. Scale bar: 10  $\mu$ m.

727 **E)** Estimation of knock-down efficiency of six siRNAs designed to target Rab35 mRNA 96h post-  
728 transfection in differentiating and polarizing hepatoblasts *in vitro* (n =2, SD).

729

730 **Figure S7 (Related to Figure 7): *In utero* injection method validated by silencing of GFP in GFP-**  
731 **expressing mouse line**

732 **A)** Schematic overview of *in utero* injection experiments.

733 **B)** Microscopy images showing the down-regulation of GFP in GFP expressing mouse livers via  
734 *in utero* injection of LNP-siGFP in comparison to livers injected with control LNP-siLuc. Scale bar:  
735 30  $\mu$ m.

736 **C)** Immunofluorescence microscopy images of the livers injected with LNP-siRab35 and stained  
737 for HNF4a (yellow) and Sox9 (magenta). Scale bar: 30  $\mu$ m.

738

## 739 **Star Methods**

### 740 **Lead Contact**

741 Further information and requests for resources and reagents should be directed to and will be  
742 fulfilled by the Lead Contact, Marino Zerial ([zerial@mpi-cbg.de](mailto:zerial@mpi-cbg.de)).

743

### 744 **Materials Availability**

745 All unique/stable reagents generated in this study are available from the Lead Contact with a  
746 completed Materials Transfer Agreement.

### 747 **Data and Code Availability**

748 Bulk RNA-sequencing data will be deposited to the NCBI Gene Expression Omnibus (GEO) under  
749 accession number GEO upon acceptance. Code for the scripts will be made available upon  
750 acceptance.

751

## 752 **Experimental Model and Subject Details**

### 753 **Animals and animal handling**

754 Animal experiments were conducted in accordance with German animal welfare legislation in  
755 pathogen-free conditions in the animal facility of the MPI-CBG, Dresden, Germany. Mice were  
756 maintained in a conventional barrier animal facility with a climate-controlled environment on a  
757 12-h light/12-h dark cycle, fed ad libitum with regular rodent chow. Protocols were approved by  
758 the Institutional Animal Welfare Officer (Tierschutzbeauftragter), and necessary licenses were  
759 obtained from the regional Ethical Commission for Animal Experimentation of Dresden,  
760 Germany (Tierversuchskommission, Landesdirektion Dresden).

761 For primary hepatoblast isolations, embryonic livers were collected from time-pregnant (E13.5-  
762 E14.5) wild-type mice C57BL/6J0laHsd (Harlan laboratories/Envigo, USA) or C57BL6/JRj (Janvier  
763 Labs, France), or transgenic lines LifeAct-EGFP (Riedl et al., 2010), ROSAmT/mG (Muzumdar et  
764 al., 2007) or the incross of the two transgenic lines. For *in utero* LNP injection experiments, the  
765 GFP-expressing embryos were generated by crossing of ROSAmT/mG female with PGKCre(J)  
766 male (Lallemand et al., 1998). The transgenic or wild-type embryos were injected *in utero* via  
767 vitelline vein at E13.5 and livers collected at E16.5 – E17.5.

### 768 **Primary hepatocytes**

769 Primary hepatocytes were isolated from male 8-12 week-old mice according to the established  
770 protocol (Klingmüller et al., 2006) and processed immediately for RNA isolation.

771

### 772 **Chol/L cell line**

773 Large cholangiocyte (bile duct cell) cell line (Ueno et al., 2003) was cultured as monolayer or in  
774 a 100% Matrigel drop in DMEM + GlutaMAX High Glucose (Cat. No. 31966, Gibco), 5% FBS (heat  
775 inactivated), 10 mM HEPES, 1x NEAA (Cat. No. 11140-050, Gibco).

776

### 777 **QBI-239A**

778 Cell line was cultured in DMEM High Glucose (Cat. No. 41966-029, Gibco) with 5% FBS (heat  
779 inactivated) and used for the production of adenovirus.

780

## 781 **Method Details**

### 782 **Dlk+ hepatoblast isolation**

783 Hepatoblasts were isolated as Dlk+ fraction using magnetic cell separation. The protocol was  
784 adapted from Tanimizu et al. (2003) with several changes. Timed-pregnant mice (E13.5-14.5)  
785 were sacrificed by cervical dislocation. 16-24 embryonic livers were collected, fragmented and  
786 incubated in Liver perfusion media (Thermo Fisher Scientific, Cat. No. 17701-038) for 20 min in  
787 a 37°C water bath. The liver pieces were digested in Liver Digest Medium (Thermo Fisher  
788 Scientific, Cat. No. 17703-034,) supplemented with 10 µg/ml DNase I (cat. No. DN25, Sigma-  
789 Aldrich) for further 20 min. Erythrocytes were lysed in Red blood cell lysis buffer (155 mM  
790 NH<sub>4</sub>Cl, 10 mM KHCO<sub>3</sub>, 0.1 mM Na<sub>4</sub>EDTA, pH 7.4). Digested cells were incubated with blocking  
791 antibody Rat Anti-Mouse CD16/CD32 (BD Biosciences, Cat. No. 553142, 1:100) for 10 min, then  
792 with Anti-Dlk mAb-FITC (MBL, Cat. No. D187-4, 1:40) for further 15 min. After washing with a  
793 buffer (0.5% BSA, 2 mM EDTA in PBS), cells were incubated with Anti-FITC MicroBeads (Miltenyi  
794 Biotec, Cat. No. 130-048-701, 1:10) for 15 min and separated on a magnetic column (Miltenyi  
795 Biotec, Cat. No. 130-024-201) according to the manufacturer's protocol.

796

### 797 **Hepatoblasts culture and differentiation**

798 Culture wells were pre-coated with Matrigel (BD Biosciences, Cat. No. 356231, 10% Matrigel in  
799 PBS) for 30 min at 37°C and washed with PBS. Dlk+ enriched cells were seeded in Expansion  
800 media (DMEM/F-12, GlutaMAX™ supplement (ThermoFisher, Cat. No. 31331028), 10% FBS, 1x  
801 ITS-X (Gibco, Cat. No. 51500-056), 0.1 µM Dexamethasone (Sigma-Aldrich, Cat. No D1756-  
802 25MG,)), 10 mM Nicotinamide (Sigma-Aldrich, Cat. No. N0636-100G), 10 ng/ml human HGF (in-  
803 house production), 10 ng/ml mouse EGF (in-house production). In 96-well plates, cells were  
804 seeded at the density 13 000 cells/well, in 24-well plates at the density 60 000 cells/well. 24h  
805 later, the cells were overlaid with Differentiation media (MCDB131, no glutamine, (Gibco, Cat.  
806 No. 10372019), 5% FBS, 2 mM L-glutamine (ThermoFisher, Cat. No. M11-004), 1x ITS-X (Gibco,  
807 Cat. No. 51500-056), 0.1 µM Dexamethasone (Sigma-Aldrich, Cat. No D1756-25MG)) containing

808 Matrigel to the final 5%. Cells were cultured for 5 days at 37°C, 5% CO<sub>2</sub> with one additional  
809 Differentiation media change. Dlk+ cells from E14.5 livers contained ~ 10% cells positive for bile  
810 duct cell marker Sox9 and were used in the experiments to optimize the growth of bile duct  
811 cysts. For other experiments, Dlk+ cells from E13.5 livers were used, as all the cells gave rise to  
812 hepatocytes with BC in the above culture conditions.

813

#### 814 **Live-cell time-lapse microscopy**

815 For the live-cell video microscopy, LifeAct-EGFP (Riedl et al., 2010) and ROSAmT/mG  
816 (Muzumdar et al., 2007) mouse strains were crossed and EGFP+ embryos were collected for the  
817 Dlk+ cells' isolation. The Dlk+ cells were plated (transfected with siRNA) and imaged from the  
818 day 3 of the culture at an epifluorescent microscope Zeiss Axiovert 200 M with an incubator  
819 (37°C, 5% CO<sub>2</sub>) using an 20x objective (NA 0.5) in 10 min intervals for approximately 52 h. To  
820 image the localization of EGFP-Rab35, the Dlk+ cells were isolated from ROSAmT/mG embryos  
821 and transduced with a recombinant adenovirus (AdenoEGFP-Rab35) at day 2 of the culture.  
822 The cells were imaged on the day 3 in 5 min intervals for up to 24h.

823

#### 824 **Immunofluorescence staining and confocal imaging**

825 Cultured cells were fixed with 3% PFA for 15 min at RT, washed 3x with PBS, permeabilized with  
826 0.1% Triton X-100 in PBS for 5 min at RT, and blocked with 0.5% FBS in PBS for min 30 min at RT.  
827 Primary antibodies were diluted in the blocking solution, rat monoclonal anti-CD13 (Novus, Cat.  
828 No. NB100-64843, 1:500), rabbit polyclonal anti-ZO-1 (Thermo Fisher Scientific, Cat. NO. 40-  
829 2200, 1:200), rat monoclonal anti-Cytokeratin 19 (Sigma-Aldrich, Cat. No. MABT913, 1:500) and  
830 goat polyclonal anti-Albumin (Novus, Cat. No. NB600-41532, 1:200) and were incubated 1h at  
831 RT or overnight at 4°C. Secondary antibodies (and/or Phalloidin-Alexa dyes (Thermo Fisher  
832 Scientific, 1:250) and DAPI (1 mg/ml, 1:1000)) were incubated for 1h at RT. For staining with  
833 rabbit polyclonal anti-Rab35 (Antibody Facility MPI-CBG Dresden, H26952, 1: 1000), the cells  
834 were permeabilized with 0.05% saponin and blocked with 3% BSA in PBS instead. Finally, cells  
835 were washed with PBS and imaged on laser scanning confocal microscopes Olympus Fluoview

836 1000 (objectives 40x/0.9/air, 60x/1.2/water), Zeiss LSM 700 (objectives 40x/1.2/water,  
837 20x/0.8/air).

838

### 839 **Single-molecule localization microscopy**

840 Single-molecule localization microscopy (SMLM) experiments were performed on a Nikon  
841 Eclipse Ti microscope, which is specified elsewhere in detail (Franke et al., 2019). Prior to  
842 acquisition, samples were irradiated in epifluorescence illumination mode to turn emitters,  
843 which were out-of-focus in the acquisition HILO illumination scheme, into the dark state. The  
844 length of the acquisition was set to capture the majority of emitters, i.e. imaging was concluded  
845 when only a very minor number of active emitters was detectable. When a critically low spot  
846 density was first reached, an acquisition scheme of 1 frame with low 405 nm excitation  
847 (activation) followed by 5 consecutive frames with 641 nm excitation, was used. Typical  
848 acquisition lengths were 60000-200000 frames with 20 ms integration time and 641 nm  
849 excitation. Raw image stacks were analysed with rapidSTORM 3.2 (Wolter et al., 2012). The  
850 FWHM was set as a free fit parameter, but in the limits of 275–650 nm, which corresponds to  
851 an axial range of approximately 1 $\mu$ m (Franke et al., 2016), the fit window radius was set to 1200  
852 nm, the intensity threshold to 1000 photons, while all other fit parameters were kept from the  
853 default settings in rapidSTORM 3.2. Linear lateral drift correction was applied by spatio-  
854 temporally aligning distinct structures to themselves. This was facilitated by color-coding of the  
855 temporal coordinate with the built-in tool.

856

### 857 **Transmission electron microscopy**

858 *In vitro* cultures of hepatoblasts grown in 24-well plates were fixed by adding warm 2%  
859 glutaraldehyde in 200 mM HEPES, pH 7.4 to the culture medium at a 1:1 ratio and incubated for  
860 5 min at 37 °C. Then the fixative and medium mixture was replaced by adding fresh 1%  
861 glutaraldehyde in 200 mM HEPES, pH 7.4 and samples incubated at 37 °C for another 2 hours,  
862 then at room temperature overnight. For resin embedding samples were post-fixed with 1%  
863 osmium tetroxide and 1.5% potassium ferricyanide for 1 hour on ice, then contrasted en-bloc  
864 with 2% aqueous uranyl acetate for 2 hours at room temperature, dehydrated with a graded

865 ethanol series: 70-80-90-96%, each for 10 min, and 4x 100%, each for 15 min, progressively  
866 infiltrated with LX-112 epoxy resin (Ladd Research Industries) and eventually polymerized at 60  
867 °C for 2 days. The plastic of the plate was broken off to release resin disks with a cell monolayer  
868 on one side. Disks were cut into small pieces that were remounted for longitudinal sectioning.  
869 To collect the mouse embryonic liver, a pregnant mouse was sacrificed and liver organs were  
870 dissected from embryos and cut into a few pieces, which were immersion fixed with 4%  
871 paraformaldehyde in 200 mM HEPES, pH 7.4, 1mM CaCl<sub>2</sub> overnight. Before resin embedding,  
872 liver tissue was cut in small pieces and additionally fixed with 1% glutaraldehyde in 200 mM  
873 HEPES, pH 7.4. Tissue was processed as described above except that epon resin was used for  
874 embedding. Tissue was sectioned at random orientation.

875 Serial, 90-nm thin sections were cut using a Leica Ultracut UCT ultramicrotome and deposited  
876 on formvar-coated, slot, copper grids. Sections were contrasted with 0.4% lead citrate for 1 min  
877 and imaged in a Tecnai T12 transmission electron microscope (ThermoFisher), operated at 100  
878 kV and equipped with an axial 2k CCD camera (TVIPS).

879 Z-stack of images of serial sections were aligned using a TrackEM2 plugin in Fiji (Cardona et al.,  
880 2012). The liver apical membrane, bile canaliculus lumen, and junctional complex were  
881 segmented on aligned image stacks using IMOD (Kremer et al., 1996) and Blender (Blender,  
882 2010) in order to reconstruct a 3-D model.

883

#### 884 **siRNA design, synthesis, transfection**

885 Design of siRNA was performed using in-house software, first by testing all available sequences  
886 on the specificity for the target in mouse transcriptome (RefSeq in Pubmed), followed by  
887 elimination of sequences with significant complementarity to mouse miRNA, GC content below  
888 25% and higher than 75% and immune responsive ones (like UGU, UGUGU, etc.). In addition,  
889 sequences were filtered using Reynolds rules (Reynolds et al., 2004). Six siRNAs with highest  
890 functionality score were selected and synthesized by solid phase phosphoramidite method,  
891 purified by IE-HPLC and verified by LC-MS (Farzan et al., 2017). Pyrimidines in the sense strand  
892 and before A in antisense strand (UA, CA dinucleotides) were 2'-O-methylated (shown by lower  
893 case letters in the sequence) and both strands were 3'-modified with phosphorothioate

894 dithymidylate (TsT) to enhance nuclease stability. Working stocks were prepared by diluting  
895 siRNAs to 10  $\mu$ M in 10 mM Tris.HCl, pH 7.5. siRNAs were transfected using transfection reagent  
896 Lipofectamine™ RNAiMAX (Thermo Fisher Scientific, Cat. No. 13778075) according to the  
897 reverse transfection protocol provided by the manufacturer. The final concentration per well  
898 was 10 nM siRNA and 0.1 v/v% Lipofectamine™ RNAiMAX.

899

### 900 **Protein extraction and Western blotting**

901 Cultured cells were lysed for 20 min in ice-cold SDS lysis buffer (20 mM Tris-HCl, pH 7.5, 150  
902 mM NaCl, 1 mM EDTA, 1 mM EGTA, 1% SDS, 1% NP-40 (IGEPAL CA-630), freshly added 1/1000  
903 CLAAAP (Chymostatin, Leupeptin, Antipain, Aprotinin, APMSF, Pepstatin), 1/100 Phosphatase  
904 Inhibitor Cocktail 2 and 3 (Sigma Aldrich). Per condition, five wells of a 96-well plate were  
905 pooled together into total of 125  $\mu$ l of the SDS lysis buffer. The lysates were sonicated for 3 min  
906 and spun at 13000 x g for 10 min, 4°C. Protein concentration was measured with DC™ Protein  
907 Assay (Bio-Rad, Cat. No. 500-0116,). The samples were separated on 15% SDS-PAGE and  
908 transferred onto nitrocellulose membrane. Membranes were blocked and incubated with  
909 primary antibodies rabbit polyclonal anti-Rab35 (Antibody Facility MPI-CBG Dresden, F18256,  
910 1:1000) and mouse monoclonal anti- $\gamma$ -tubulin (Sigma-Aldrich, Cat. No. T6557, 1:2000) and  
911 secondary HRP-conjugated antibodies (1:10000) in 5 % dry-milk, 10 mM Tris-HCl pH 8.0,  
912 200 mM NaCl, 0.1 % Tween20. The bound antibody was detected with ECL™ Western Blotting  
913 detection kit (GE Healthcare, Cat. No. RPN2209) on Hyperfilm ECL (Amersham GE Healthcare).  
914 The quantification of Western blots was done with Image J (Miller, 2010), statistics were  
915 calculated and plots were generated in R (R Development Core Team, 2008).

916

### 917 **RNA isolation and RT-qPCR**

918 Total RNA was isolated using RNeasy Mini Kit (Qiagen, Cat. No. 74104 50,) including the DNase I  
919 (Qiagen, cat. No. 79254) treatment step. Cells were lysed with RTL buffer supplemented with  
920 DTT. cDNA was synthesized using ProtoScript®II First Strand cDNA Synthesis Kit (NEB, Cat. No.  
921 E6560S), following the manufacturer's protocol with the Random Primer Mix and the RNA  
922 denaturation step. qPCR was performed on Roche LightCycler® 96 in 10- $\mu$ l reactions using

923 FastStart Essential DNA Green Master (Roche, Cat. No. 06402712001). A housekeeping gene  
924 Rplp0 was used as an endogenous reference gene. Normalized relative gene expression value  
925 and % knock-down was calculated using  $\Delta\Delta Cq$  method (Haimes and Kelley, 2010), statistics  
926 were calculated and plots were generated in R (R Development Core Team, 2008).

927

### 928 **Bulk RNA-sequencing**

929 Two independent experiments were performed. For the experiment A following four samples  
930 were collected in 4 biological replicates: E14.5 Dlk+ hepatobalsts isolated and immediately  
931 processed for RNA isolation, *in vitro* differentiated hepatocytes from E14.5 Dlk+ hepatoblasts  
932 differentiated for 4 days in Differentiation media with 4% Matrigel grown on fibronectin  
933 coating, mature hepatocytes isolated from adult male mice following published protocols  
934 (Klingmüller et al., 2006) and immediately processed for RNA isolation. Chol/L cell line was  
935 grown as a monolayer or as a 3D cyst in 100% Matrigel drops until the polarization could be  
936 visible by proper localization of apical and lateral markers and then processed for RNA isolation.  
937 For the experiment B, the samples in 3 biological replicates were collected from *in vitro*  
938 cultured E13.5 Dlk+ hepatoblasts transfected with siRNA targeting Rab35 (siRNA #4), or non-  
939 targeting control Luciferase (siLuc) at day 5 of the culture. Rab35 mRNA knock-down was  
940 verified by RT-qPCR. The integrity of RNA was measured by Agilent 2100 Bioanalyzer.  
941 Preferentially, only samples with the RNA integrity number (RIN) > 9.0 were used. 1 µg  
942 (Experiment A) or 300 ng (Experiment B) mRNA was isolated from the total RNA by poly-dT  
943 enrichment using the NEBNext Poly(A) mRNA Magnetic Isolation Module according to the  
944 manufacturer's instructions. Final elution was done in 15ul 2x first strand cDNA synthesis buffer  
945 (NEBnext, NEB). After chemical fragmentation by incubating for 15 min at 94°C the sample was  
946 directly subjected to the workflow for strand specific RNA-Seq library preparation (Experiment  
947 A: NEBNext® Ultra™ RNA Library Prep Kit for Illumina®, Experiment B: NEBNext® Ultra™ II  
948 Directional RNA Library Prep Kit for Illumina®). For ligation custom adaptors were used  
949 (Adaptor-Oligo 1: 5'-ACA CTC TTT CCC TAC ACG ACG CTC TTC CGA TCT-3', Adaptor-Oligo 2: 5'-P-  
950 GAT CGG AAG AGC ACA CGT CTG AAC TCC AGT CAC-3'). After ligation, adapters were depleted  
951 by an XP bead purification (Beckman Coulter) adding bead in a ratio of 1:1. Indexing was done



952 during the following PCR enrichment (15 cycles, 65 °C) using custom amplification primers  
953 carrying the index sequence indicated with 'NNNNNN'. (Primer1: Oligo\_Seq AAT GAT ACG GCG  
954 ACC ACC GAG ATC TAC ACT CTT TCC CTA CAC GAC GCT CTT CCG ATC T, primer2: GTG ACT GGA  
955 GTT CAG ACG TGT GCT CTT CCG ATC T, primer3: CAA GCA GAA GAC GGC ATA CGA GAT  
956 NNNNNN GTG ACT GGA GTT. After two more XP beads purifications (1:1) libraries were  
957 quantified using Qubit dsDNA HS Assay Kit (Invitrogen). For Illumina flowcell production,  
958 samples were equimolarly pooled and distributed on all lanes used for 75bp single read  
959 sequencing on Illumina HiSeq 2500 (or Illumina NextSeq 500 for the experiment B) resulting in  
960 on average 30 (or 33 for the experiment B) Mio sequenced fragments per sample.

### 961 **Recombinant adenovirus production and rescue experiments**

962 Recombinant adenovirus to express EGFP-fused Rab35 (Human RAB35 cDNA, transcript variant  
963 1 (NM\_006861.7)) was produced using AdEasy<sup>TM</sup> Vector System (Qbiogene) developed by (He  
964 et al., 1998). A linker GGGGSGGGGS was introduced between EGFP and RAB35. RAB35  
965 fragment with the linker extension was amplified from the Addgene plasmid #47424, a gift from  
966 Peter McPherson (Allaire et al., 2010), and subcloned into pEGFP-C3 vector (Clontech) using  
967 *ScaI* and *BamHI* restriction sites. The EGFP-linker-RAB35 fragment was cloned into a transfer  
968 vector pShuttle-CMV (AdEasy Vector System, Qbiogene) using *SalI* and *HindIII* restriction sites.  
969 The recombinant transfer vector was linearized by *PmeI* and transformed into electro-  
970 competent *E.coli* strain BJ5183-AD-1 (Stratagene, Cat. No. 200157-11) for *in vivo* recombination  
971 with pAdEasy vector. A positive clone was amplified in *E. coli* DH5 $\alpha$  and linearized with *PacI*  
972 prior the transfection into the packaging cell line QBI-293A (Qbiogene HEK-293A cell  
973 derivative). Virus was amplified and purified via OptiPrep-gradient (Iodixanol 60 w/v% solution,  
974 Axis Shield, Cat. No.1114542). The control EGFP only virus was produced similarly.

975  
976 E13.5 Dlk+ hepatoblasts were seeded and transfected as described above with Luc siRNA or  
977 Rab35 siRNA #4. 72h later, the cells were infected with the recombinant adenovirus (EGFP or  
978 EGFP-Rab35) at dilution 1/1000 and 1/100, respectively. The cells were cultured for 2 more  
979 days, fixed, and stained with Phalloidin-Alexa 647 and DAPI. From the acquired images, the  
980 rescue of the lumen phenotype was quantified.

981 ***In utero* siRNA-LNP injection**

982 For the use *in vivo*, siRNA oligos were formulated into lipid nanoparticles (LNPs) with C12-200  
983 lipid as previously described (Love et al., 2010). siRNA-LNPs were delivered *in utero* into E13.5  
984 embryonic livers via vitelline vein as described elsewhere (Ahn et al., 2018). We optimized the  
985 concentration of siRNA-LNPs to 5 mg/kg body weight and the length of the treatment to 4 days  
986 using siRNAs-LNPs targeting GFP mRNA (Gilleron et al., 2013) in ROSAmG embryos (generated  
987 from the cross of ROSA mG/mT x PGKCre(J) lines). The weight of the embryos was estimated  
988 based on the published results (Kulandavelu et al., 2006). Briefly, the pregnant mice were  
989 anesthetized in a narcosis box with isoflurane at 5% then placed on a heated stage attached to  
990 a narcosis mask flowing isoflurane at 2-3%. Analgesia was ensured by injecting 4 mg/kg of  
991 Metamizol right before surgery and maintained by adding 1.33 mg/mL of the same drug in the  
992 drinking water until sacrifice. The abdomen of the mice was shaved and then sterilized with  
993 ethanol; the eyes protected from desiccation using hydration cream. The uterus was exposed  
994 via vertical laparotomy. The embryos were then injected with 5 $\mu$ L of LNPs at 5mg/kg. The  
995 success of the injection was assessed by blood clearance from the targeted vessel. Embryos of  
996 the same mother were randomly assigned to be non-injected, injected with control siRNA or  
997 injected with the targeting siRNA. The injections were performed using pulled needles from  
998 manually labelled glass capillaries. After injections, embryos were placed back in the abdomen  
999 and the peritoneal cavity was closed by suturing. The epidermis was then closed with surgical  
1000 clips. At the end of the surgery the mice were placed close to a heating lamp and monitored  
1001 until complete awakening. The livers were collected at E17.5.

1002

1003 **Liver tissue staining with optical clearing**

1004 Embryonic livers were fixed by PFA immersion (4 % PFA, 0.1 % Tween20, PBS) for 2 hours at RT  
1005 and overnight at 4 °C. The PFA was neutralized by overnight incubation in 50 mM NH<sub>4</sub>Cl in PBS.  
1006 The livers were later stored in PBS at 4 °C until processing. The livers were mounted in 4% low-  
1007 melting agarose in PBS and cut into 100  $\mu$ m – thick sections at a vibratome (Leica VT1200S). For  
1008 deep tissue imaging, tissue sections were permeabilized with by 0.5% TritonX100 in PBS for 1  
1009 hour at RT. The primary antibodies rat monoclonal anti-CD13 (Novus, NB100-64843, 1:500) and

1010 rabbit monoclonal anti-Sox9 (Abcam, Cat. No. ab185966, 1:500) were diluted in Tx buffer (0.2%  
1011 gelatin, 300 mM NaCl, 0.3% Triton X-100 in PBS) and incubated for 2 overnights at RT. After  
1012 washing 5 x 15 min with 0.3% TritonX-100 in PBS, the sections were incubated with secondary  
1013 antibodies donkey anti-rat 568 (BIOTIUM, Cat. No. 20092, 1:1000), donkey anti-rabbit 647  
1014 (Thermo Fisher Scientific, Cat. No. A31573, 1:1000) and DAPI (1 mg/ml, 1:1000) and Phalloidin-  
1015 Alexa488 (Thermo Fischer Scientific, Cat. No. A12379, 1:150) for another 2 overnights. After  
1016 washing 5 x 15 min with 0.3% TritonX-100 in PBS and 3 x 1 min with PBS, the optical clearing  
1017 started by incubating the slices in 25% fructose for 4 hours, continued in 50% fructose for 4  
1018 hours, 75% fructose overnight, 100% fructose (100% wt/v fructose, 0.5% 1-thioglycerol, 0.1M  
1019 phosphate buffer pH 7.5) for 6 hours, and finally overnight in SeeDB solution (Ke et al., 2013)  
1020 (80.2% wt/wt fructose, 0.5% 1-thioglycerol, 0.1M phosphate buffer). The samples were  
1021 mounted in SeeDB.

1022

### 1023 **Quantification and Statistical Analysis**

#### 1024 **3D reconstruction of bile canaliculi**

1025 Optically cleared 100- $\mu\text{m}$  liver sections were imaged with an upright multiphoton laser-  
1026 scanning microscope (Zeiss LSM 780 NLO) equipped with Gallium arsenide phosphide (GaAsp)  
1027 detectors. Liver slices were imaged twice at low (20x/0.8 Zeiss objective) and high resolution  
1028 (63x/1.3 Zeiss objective, 0.3  $\mu\text{m}$  voxel size), respectively. Low-resolution overviews of the  
1029 complete liver sections were created and used to select for regions where enlarged apical  
1030 membranes were apparent. Selected regions ( $\sim 300 \mu\text{m} \times 300 \mu\text{m} \times 100 \mu\text{m}$ ; x, y, z) were then  
1031 acquired at high resolution. High-resolution images were processed and bile canaliculi  
1032 segmented, based on CD13 staining, with the Motion Tracking software as described (Morales-  
1033 Navarrete et al., 2015; Morales-Navarrete et al., 2016). Local lumen radius distribution was  
1034 calculated by assuming a maximal radius of 10  $\mu\text{m}$ .

1035 For cells segmentation, a selected region of an image ( $\sim 70 \mu\text{m} \times 70 \mu\text{m} \times 60 \mu\text{m}$ ; x, y, z) was  
1036 denoised using the PURE-LET method (Luisier et al., 2010), i.e. through the 'PureDenoise' plugin  
1037 in ImageJ, with Cycle-spin = 10 and Multiframe = 11. Shading and uneven illumination were

1038 then corrected using BaSiC algorithm (Peng et al., 2017) and Rolling Ball Background  
1039 Subtraction plugins in Fiji, respectively. The pre-processed image was imported to Motion  
1040 Tracking and apical membranes were reconstructed as above. Cells surrounding an apical tube  
1041 were segmented using the 3D active mesh approach with phalloidin staining as a marker of cells  
1042 border, as described in (Morales-Navarrete et al., 2015).

### 1043 **Lumen radius quantification**

1044 To quantify the effect of Rab35 silencing and Rab35 rescue on lumen morphology *in vitro*, a  
1045 custom script was written for FIJI to segment lumina on microscopy images based on the actin  
1046 signal (Phalloidin-Alexa 647) and extract region statistics. For the rescue experiment, the  
1047 segmentation mask was set so that only lumina with a minimum (70%) overlap with GFP  
1048 channel (expressed protein) were kept for the analysis (the cells that actually express the  
1049 protein). The script contained a pause for segmentation verification and manual correction. For  
1050 quantifying lumen radius, we used “local thickness” as descriptor, which can be computed with  
1051 a Fiji plugin ([https://imagej.net/Local\\_Thickness](https://imagej.net/Local_Thickness)). The local thickness at any interior point of an  
1052 object is defined as the diameter of the largest circle that contains the point and completely fits  
1053 into the object. For each lumen, the local thickness histogram, as well as the average local  
1054 thickness, was computed.

1055 Then, the local thickness histogram of each object was normalized. To account for the different  
1056 size of the objects, each normalized histogram was multiplied by a weighting factor  $w_i$ , which is  
1057 proportional to the estimated volume of the object  $i$ . Without losing generality, we defined  
1058  $w_i = A_i^{3/2}$ , where  $A_i$  is the number of pixels belonging to the object. Then, the histograms of all  
1059 the objects in each image were summed up and normalized (i.e. to discard the effect of  
1060 differences in the total amount of apical membrane between images). Finally, the averaged  
1061 histograms (first over different images and then between different experiments  $N = 3$ ) are  
1062 reported. Error bars show the standard error of the mean (SEM) per bin. The histogram  
1063 quantification was performed using MATLAB R2020b.

### 1064 **Differential gene expression analysis**

1065 Basic quality control of raw sequencing data was performed with FastQC v0.11.2 (Andrews,  
1066 2010). Reads were mapped to the mouse genome reference assembly GRCm38 and genes of  
1067 the Ensembl release v92 (Zerbino et al., 2018) were quantified using STAR v2.5.2b (Dobin et al.,  
1068 2013). Based on the read duplication level assessed using MarkDuplicates from Picard tools  
1069 v2.10.2 (Broad Institute, 2018), and dupRadar v1.8.0 (Sayols et al., 2016), the replicate 3 of the  
1070 sample Chol/L cell line (3D cysts) was identified as an outlier and removed from the ‘Experiment  
1071 A’ data set. The count data of the remaining samples were filtered for genes with more than 10  
1072 counts in any of the samples and served as input for DESeq2 v1.22.2 (Love et al., 2014) to  
1073 identify differentially expressed genes using a log<sub>2</sub>fold-change threshold of 1 and an adjusted  
1074 p-value cut-off of 0.01. The differential gene expression analysis of the ‘Experiment B’ data set  
1075 was performed using DESeq2 v1.18.1 using a log<sub>2</sub>fold-change threshold of 0.5. We corrected  
1076 for the batch effect due to different sample preparation days. The heatmap and the volcano  
1077 plot were generated using R packages gplots (function heatmap.2) and EnhancedVolcano,  
1078 respectively.

1079

### 1080 **Gene Set Enrichment Analysis (GSEA)**

1081 GSEA was conducted using the tool GSEAPreranked from the software GSEA v4.1.0 (Mootha et  
1082 al., 2003; Subramanian et al., 2005) with the default settings. For generating the ranked gene  
1083 lists for three cell types DESeq2 1.28.1 (Love et al., 2014) was applied. The gene lists were  
1084 filtered for genes with p-values < 0.05, sorted in a decreasing order by their log<sub>2</sub>FC values and  
1085 used as an input for the GSEA.

1086

### 1087 **Supplemental video and tables**

#### 1088 **Video Figure 1D: Formation of BC *in vitro***

1089 Live-cell time-lapse microscopy documenting the formation of BC between two differentiating  
1090 hepatoblasts expressing LifeAct-EGFP. Images acquired in 10-min intervals. Scale bar: 10 μm.

1091

#### 1092 **Video Figure 2F: Animation of a simplified model of BC with bulkheads**

1093

1094 Simplified model of BC based on the 3D reconstruction in Figure 2E with periodic bulkhead-like  
1095 membrane connections containing tight junctions (red) formed from the top or the bottom of

1096 the lumen. The apical plasma membrane of the lumen-forming cells is represented in green and  
1097 blue.

1098

1099 **Video Figure 4B': Cysts formed upon Rab35 silencing *in vitro***

1100 Confocal z-stack shows multiple cyst-like structures formed upon Rab35 silencing in  
1101 differentiating hepatoblasts *in vitro*. Cells were stained for F-actin and nuclei. Scale bar: 30  $\mu\text{m}$ .

1102 **Video Figure 5A: Formation of a spherical lumen upon Rab35 silencing *in vitro***

1103 Live-cell time-lapse microscopy showing the growth of a spherical lumen between two  
1104 differentiating hepatoblasts expressing LifeAct-EGFP upon Rab35 silencing. Images acquired in  
1105 10-min intervals. Scale bar: 10  $\mu\text{m}$ .

1106 **Video Figure 5B: Formation of a multi-cellular cyst *in vitro* upon Rab35 silencing**

1107 Live-cell time-lapse microscopy documenting the formation of a multicellular cyst upon Rab35  
1108 silencing in differentiating hepatoblasts expressing LifeAct-EGFP. Images acquired in 10-min  
1109 intervals. Scale bar: 10  $\mu\text{m}$ .

1110 **Video Figure 7CD: 3D reconstruction of luminal network in livers injected with LNP-siLuc or**  
1111 **LNP-siRab35**

1112 3D reconstruction of lumina labelled with an apical marker CD13 in 100  $\mu\text{m}$ -thick sections of  
1113 liver tissue injected with LNP-siLuc and LNP-siRab35. CD13 staining is shown first, then the 3D  
1114 reconstruction based on the staining. The veins are shown in red. Scale bar: 30  $\mu\text{m}$ .

1115

1116 **Video Figure 7F: 3D reconstruction of a tubule formed in LNP-siRab35-injected liver**

1117 3D reconstruction of a tubule found in LNP-siRab35 injected livers. First, CD13 staining is  
1118 shown, next, the reconstructed lumen in green, and finally reconstructed cells in random  
1119 colours. The lumen is surrounded by multiple cells.

1120 **Suppl. Video S1: 3D model of BC based on EM data**

1121 3D reconstruction of EM serial sections in Figure 2B based on apical plasma membranes and  
1122 tight junctions rendering. The apical plasma membrane of the lumen-forming cells is in green  
1123 and blue, the tight junctions are highlighted in red.

1124

1125 **Video Figure S1A: Formation of multiple BC lumens by a single differentiating hepatoblast**

1126 Live-cell time-lapse microscopy documenting the formation of multiple BC lumens by a single  
1127 differentiating hepatoblasts expressing LifeAct-EGFP. Images acquired in 10-min intervals. Scale  
1128 bar: 10  $\mu\text{m}$ .

1129 **Video Figure S1B: Branching and fusion of BC lumen**

1130 Live-cell time-lapse microscopy of branching and fusing BC lumens formed by differentiating  
1131 hepatoblasts expressing LifeAct-EGFP. Images acquired in 10-min intervals. Scale bar: 10  $\mu$ m.

1132 **Video Figure S1C: Recovery of tubular BC lumen**

1133 Live-cell time-lapse microscopy documenting the adjustment of a spherical lumen into a of a  
1134 tubular lumen in differentiating hepatoblasts expressing LifeAct-EGFP. Images acquired in 10-  
1135 min intervals. Scale bar: 10  $\mu$ m.

1136

1137 **Table S1 (Related to Figure 4 and S4): Genes included in the focused siRNA screen**

| Gene name            | Gene ID | Lumen phenotype  | Number of siRNAs with phenotype | Category                            |
|----------------------|---------|------------------|---------------------------------|-------------------------------------|
| <i>Tjp1</i>          | 21872   | Loss of polarity | 4/6                             | Apical junctions                    |
| <i>Ocln</i>          | 18260   | Loss of polarity | 2/6                             | Apical junctions                    |
| <i>Cldn2</i>         | 12738   | None             | 0/6                             | Apical junctions                    |
| <i>Gjb1</i>          | 14618   | None             | 0/6                             | Apical junctions                    |
| <i>Pard3</i>         | 93742   | None             | 0/6                             | Apical junctions/ Cytoskeleton      |
| <i>Mark2 (Par1b)</i> | 13728   | None             | 0/6                             | Cytoskeleton                        |
| <i>Kif13b</i>        | 16554   | None             | 0/6                             | Cytoskeleton                        |
| <i>Stk11 (Lkb1)</i>  | 20869   | None             | 0/6                             | Cytoskeleton                        |
| <i>Cdc42</i>         | 12540   | Spherical lumina | 3/6                             | Cytoskeleton/ Polarized trafficking |
| <i>Arf6</i>          | 11845   | Cyst-like lumina | 1/6                             | Cytoskeleton/ Polarized trafficking |
| <i>Rab35</i>         | 77407   | Cyst-like lumina | 5/6                             | Cytoskeleton/ Polarized trafficking |
| <i>Rab4a</i>         | 19341   | None             | 0/6                             | Polarized trafficking               |
| <i>Rab4b</i>         | 19342   | None             | 0/6                             | Polarized trafficking               |
| <i>Rab8a</i>         | 17274   | None             | 0/6                             | Polarized trafficking               |
| <i>Rab8b</i>         | 235442  | None             | 0/6                             | Polarized trafficking               |
| <i>Rab10</i>         | 19325   | None             | 0/6                             | Polarized trafficking               |
| <i>Rab11a</i>        | 53869   | None             | 0/6                             | Polarized trafficking               |
| <i>Rab11b</i>        | 19326   | None             | 0/6                             | Polarized trafficking               |
| <i>Rab13</i>         | 68328   | None             | 0/6                             | Polarized trafficking               |
| <i>Rab14</i>         | 68365   | None             | 0/6                             | Polarized trafficking               |
| <i>Rab17</i>         | 19329   | None             | 0/6                             | Polarized trafficking               |
| <i>Rab21</i>         | 216344  | None             | 0/6                             | Polarized trafficking               |
| <i>Rab27a</i>        | 11891   | None             | 0/6                             | Polarized trafficking               |
| <i>Rab27b</i>        | 80718   | None             | 0/6                             | Polarized trafficking               |
| <i>Mal2</i>          | 105853  | None             | 0/6                             | Polarized trafficking               |

1138

1139 **Table S2 (Related to Methods section): siRNA sequences used in the study**

1140 Excel spreadsheet

1141

## 1142 **References**

- 1143 Ahn, N.J., Stratigis, J.D., Coons, B.E., Flake, A.W., Nah-Cederquist, H.D., and Peranteau, W.H.  
1144 (2018). Intravenous and Intra-amniotic In Utero Transplantation in the Murine Model. *J. Vis.*  
1145 *Exp.*
- 1146 Akinc, A., Querbes, W., De, S., Qin, J., Frank-Kamenetsky, M., Jayaprakash, K.N., Jayaraman, M.,  
1147 Rajeev, K.G., Cantley, W.L., Dorkin, J.R., et al. (2010). Targeted delivery of RNAi therapeutics  
1148 with endogenous and exogenous ligand-based mechanisms. *Mol. Ther.* *18*, 1357–1364.
- 1149 Allaire, P.D., Marat, A.L., Dall’Armi, C., Di Paolo, G., McPherson, P.S., and Ritter, B. (2010). The  
1150 Connecdenn DENN domain: a GEF for Rab35 mediating cargo-specific exit from early  
1151 endosomes. *Mol. Cell* *37*, 370–382.
- 1152 Andrew, D.J., and Ewald, A.J. (2010). Morphogenesis of epithelial tubes: Insights into tube  
1153 formation, elongation, and elaboration. *Dev. Biol.* *341*, 34–55.
- 1154 Andrews, S. (2010). Babraham Bioinformatics - FastQC A Quality Control tool for High  
1155 Throughput Sequence Data.
- 1156 Antoniou, A., Raynaud, P., Cordi, S., Zong, Y., Tronche, F., Stanger, B.Z., Jacquemin, P., Pierreux,  
1157 C.E., Clotman, F., and Lemaigre, F.P. (2009). Intrahepatic Bile Ducts Develop According to a New  
1158 Mode of Tubulogenesis Regulated by the Transcription Factor SOX9. *Gastroenterology* *136*,  
1159 2325–2333.
- 1160 Berthoumieux, H., Maître, J.L., Heisenberg, C.P., Paluch, E.K., Jülicher, F., and Salbreux, G.  
1161 (2014). Active elastic thin shell theory for cellular deformations. *New J. Phys.* *16*.
- 1162 Blender, F. (2010). Blender v2.5- a 3D modeling and rendering package.
- 1163 Broad Institute (2018). Picard Tools.
- 1164 Bryant, D.M., and Mostov, K.E. (2008). From cells to organs: Building polarized tissue. *Nat. Rev.*  
1165 *Mol. Cell Biol.* *9*, 887–901.
- 1166 Cardona, A., Saalfeld, S., Schindelin, J., Arganda-Carreras, I., Preibisch, S., Longair, M.,  
1167 Tomancak, P., Hartenstein, V., and Douglas, R.J. (2012). TrakEM2 software for neural circuit  
1168 reconstruction. *PLoS One* *7*.
- 1169 Chaîneau, M., Ioannou, M.S., and Mcpherson, P.S. (2013). Rab35: GEFs, GAPs and Effectors.  
1170 *Traffic* *14*, 1109–1117.
- 1171 Chua, C.E.L., Lim, Y.S., and Tang, B.L. (2010). Rab35 - A vesicular traffic-regulating small GTPase  
1172 with actin modulating roles. *FEBS Lett.* *584*, 1–6.
- 1173 Clark, B.S., Cui, S., Miesfeld, J.B., Klezovitch, O., Vasioukhin, V., and Link, B.A. (2012). Loss of  
1174 Lgl1 in retinal neuroepithelia reveals links between apical domain size, Notch activity and  
1175 neurogenesis. *Development* *139*, 1599–1610.



- 1176 Cohen, D., Rodriguez-Boulan, E., and Müsch, A. (2004a). Par-1 promotes a hepatic mode of  
1177 apical protein trafficking in MDCK cells. *Proc. Natl. Acad. Sci. U. S. A.* *101*, 13792–13797.
- 1178 Cohen, D., Brennwald, P.J., Rodriguez-Boulan, E., and Müsch, A. (2004b). Mammalian PAR-1  
1179 determines epithelial lumen polarity by organizing the microtubule cytoskeleton. *J. Cell Biol.*  
1180 *164*, 717–727.
- 1181 Dambournet, D., Machicoane, M., Chesneau, L., Sachse, M., Rocancourt, M., El Marjou, A.,  
1182 Formstecher, E., Salomon, R., Goud, B., and Echard, A. (2011). Rab35 GTPase and OCRL  
1183 phosphatase remodel lipids and F-actin for successful cytokinesis. *Nat. Cell Biol.* *13*, 981–988.
- 1184 Dickinson, M.E., Flenniken, A.M., Ji, X., Teboul, L., Wong, M.D., White, J.K., Meehan, T.F.,  
1185 Weninger, W.J., Westerberg, H., Adissu, H., et al. (2016). High-throughput discovery of novel  
1186 developmental phenotypes. *Nature* *537*, 508–514.
- 1187 Dobin, A., Davis, C.A., Schlesinger, F., Drenkow, J., Zaleski, C., Jha, S., Batut, P., Chaisson, M.,  
1188 and Gingeras, T.R. (2013). STAR: ultrafast universal RNA-seq aligner. *Bioinformatics* *29*, 15–21.
- 1189 Farzan, V.M., Ulashchik, E.A., Martynenko-Makaev, Y. V., Kvach, M. V., Aparin, I.O., Brylev, V.A.,  
1190 Prikazchikova, T.A., Maklakova, S.Y., Majouga, A.G., Ustinov, A. V., et al. (2017). Automated  
1191 Solid-Phase Click Synthesis of Oligonucleotide Conjugates: From Small Molecules to Diverse *N*-  
1192 Acetylgalactosamine Clusters. *Bioconjug. Chem.* *28*, 2599–2607.
- 1193 Fölsch, H., Ohno, H., Bonifacino, J.S., and Mellman, I. (1999). A novel clathrin adaptor complex  
1194 mediates basolateral targeting in polarized epithelial cells. *Cell* *99*, 189–198.
- 1195 Franke, C., Sauer, M., and De Linde, S. Van (2016). Photometry unlocks 3D information from 2D  
1196 localization microscopy data. *Nat. Methods* *14*, 41–44.
- 1197 Franke, C., Repnik, U., Segeletz, S., Brouilly, N., Kalaidzidis, Y., Verbavatz, J.M., and Zerial, M.  
1198 (2019). Correlative single-molecule localization microscopy and electron tomography reveals  
1199 endosome nanoscale domains. *Traffic* *20*, 601–617.
- 1200 Frémont, S., Hammich, H., Bai, J., Wioland, H., Klinkert, K., Rocancourt, M., Kikuti, C., Stroebel,  
1201 D., Romet-Lemonne, G., Pylypenko, O., et al. (2017). Oxidation of F-actin controls the terminal  
1202 steps of cytokinesis. *Nat. Commun.* *8*.
- 1203 Fu, D., Wakabayashi, Y., Ido, Y., Lippincott-Schwartz, J., and Arias, I.M. (2010). Regulation of bile  
1204 canalicular network formation and maintenance by AMP-activated protein kinase and LKB1. *J*  
1205 *Cell Sci* *123*, 3294–3302.
- 1206 Fu, D., Wakabayashi, Y., Lippincott-Schwartz, J., and Arias, I.M. (2011). Bile acid stimulates  
1207 hepatocyte polarization through a cAMP-Epac-MEK-LKB1-AMPK pathway. *Proc. Natl. Acad. Sci.*  
1208 *U. S. A.* *108*, 1403–1408.
- 1209 Gilleron, J., Querbes, W., Zeigerer, A., Borodovsky, A., Marsico, G., Schubert, U., Manygoats, K.,  
1210 Seifert, S., Andree, C., Stöter, M., et al. (2013). Image-based analysis of lipid nanoparticle-  
1211 mediated siRNA delivery, intracellular trafficking and endosomal escape. *Nat. Biotechnol.* *31*,

- 1212 638–646.
- 1213 Gissen, P., and Arias, I.M. (2015). Structural and functional hepatocyte polarity and liver  
1214 disease. *J. Hepatol.* *63*, 1023–1037.
- 1215 Grosse, B., Degrouard, J., Jaillard, D., and Cassio, D. (2013). Build them up and break them  
1216 down. *Tissue Barriers* *1*, e25210.
- 1217 Haimes, J., and Kelley, M. (2010). Demonstration of a  $\Delta\Delta Cq$  Calculation Method to Compute  
1218 Relative Gene Expression from qPCR Data.
- 1219 Hannezo, E., Dong, B., Recho, P., Joanny, J.F., and Hayashi, S. (2015). Cortical instability drives  
1220 periodic supracellular actin pattern formation in epithelial tubes. *Proc. Natl. Acad. Sci. U. S. A.*
- 1221 Hayashi, S., and Dong, B. (2017). Shape and geometry control of the *Drosophila* tracheal tubule.  
1222 *Dev. Growth Differ.* *59*, 4–11.
- 1223 He, T.C., Zhou, S., Da Costa, L.T., Yu, J., Kinzler, K.W., and Vogelstein, B. (1998). A simplified  
1224 system for generating recombinant adenoviruses. In *Proceedings of the National Academy of*  
1225 *Sciences of the United States of America*, pp. 2509–2514.
- 1226 Homolya, L., Fu, D., Sengupta, P., Jarnik, M., Gillet, J.-P., Vitale-Cross, L., Gutkind, J.S.,  
1227 Lippincott-Schwartz, J., and Arias, I.M. (2014). LKB1/AMPK and PKA Control ABCB11 Trafficking  
1228 and Polarization in Hepatocytes. *PLoS One* *9*, e91921.
- 1229 Huch, M., Dorrell, C., Boj, S.F., Van Es, J.H., Li, V.S.W., Van De Wetering, M., Sato, T., Hamer, K.,  
1230 Sasaki, N., Finegold, M.J., et al. (2013). In vitro expansion of single Lgr5 + liver stem cells  
1231 induced by Wnt-driven regeneration. *Nature* *494*, 247–250.
- 1232 Jewett, C.E., and Prekeris, R. (2018). Insane in the apical membrane: Trafficking events  
1233 mediating apicobasal epithelial polarity during tube morphogenesis. *Traffic* *19*, 666–678.
- 1234 Ke, M.T., Fujimoto, S., and Imai, T. (2013). SeeDB: A simple and morphology-preserving optical  
1235 clearing agent for neuronal circuit reconstruction. *Nat. Neurosci.* *16*, 1154–1161.
- 1236 Klingmüller, U., Bauer, A., Bohl, S., Nickel, P.J., Breitkopf, K., Dooley, S., Zellmer, S., Kern, C.,  
1237 Merfort, I., Sparna, T., et al. (2006). Primary mouse hepatocytes for systems biology  
1238 approaches: A standardized in vitro system for modelling of signal transduction pathways. *IEE*  
1239 *Proc. Syst. Biol.* *153*, 433–447.
- 1240 Klinkert, K., and Echard, A. (2016). Rab35 GTPase: A Central Regulator of Phosphoinositides and  
1241 F-actin in Endocytic Recycling and Beyond. *Traffic* *17*, 1063–1077.
- 1242 Klinkert, K., Rocancourt, M., Houdusse, A., and Echard, A. (2016). Rab35 GTPase couples cell  
1243 division with initiation of epithelial apico-basal polarity and lumen opening. *Nat. Commun.* *7*,  
1244 11166.
- 1245 Kouranti, I., Sachse, M., Arouche, N., Goud, B., and Echard, A. (2006). Rab35 Regulates an

- 1246 Endocytic Recycling Pathway Essential for the Terminal Steps of Cytokinesis. *Curr. Biol.* *16*,  
1247 1719–1725.
- 1248 Kremer, J.R., Mastronarde, D.N., and McIntosh, J.R. (1996). Computer visualization of three-  
1249 dimensional image data using IMOD. *J. Struct. Biol.* *116*, 71–76.
- 1250 Kulandavelu, S., Qu, D., Sunn, N., Mu, J., Rennie, M.Y., Whiteley, K.J., Walls, J.R., Bock, N.A., Sun,  
1251 J.C.H., Covelli, A., et al. (2006). Embryonic and neonatal phenotyping of genetically engineered  
1252 mice. *ILAR J.* *47*, 103–117.
- 1253 Lallemand, Y., Luria, V., Haffner-Krausz, R., and Lonai, P. (1998). Maternally expressed PGK-Cre  
1254 transgene as a tool for early and uniform activation of the Cre site-specific recombinase.  
1255 *Transgenic Res.* *7*, 105–112.
- 1256 Landau, L.D., and Lifshitz, E.M. (1986). *Theory of Elasticity, Third Edition: (Course of Theoretical*  
1257 *Physics)*.
- 1258 Lázaro-Diéguez, F., Cohen, D., Fernandez, D., Hodgson, L., IJzendoorn, S.C.D. van, and Müsch, A.  
1259 (2013). Par1b links lumen polarity with LGN–NuMA positioning for distinct epithelial cell  
1260 division phenotypes. *J Cell Biol* *203*, 251–264.
- 1261 Li, Q., Zhang, Y., Pluchon, P., Robens, J., Herr, K., Mercade, M., Thiery, J.P., Yu, H., and Viasnoff,  
1262 V. (2016). Extracellular matrix scaffolding guides lumen elongation by inducing anisotropic  
1263 intercellular mechanical tension. *Nat. Cell Biol.* *18*, 311–318.
- 1264 Löf-Öhlin, Z.M., Nyeng, P., Bechard, M.E., Hess, K., Bankaitis, E., Greiner, T.U., Ameri, J., Wright,  
1265 C. V., and Semb, H. (2017). EGFR signalling controls cellular fate and pancreatic organogenesis  
1266 by regulating apicobasal polarity. *Nat. Cell Biol.* *19*, 1313–1325.
- 1267 Love, K.T., Mahon, K.P., Levins, C.G., Whitehead, K.A., Querbes, W., Dorkin, J.R., Qin, J., Cantley,  
1268 W., Qin, L.L., Racie, T., et al. (2010). Lipid-like materials for low-dose, in vivo gene silencing.  
1269 *Proc. Natl. Acad. Sci. U. S. A.* *107*, 1864–1869.
- 1270 Love, M.I., Huber, W., and Anders, S. (2014). Moderated estimation of fold change and  
1271 dispersion for RNA-seq data with DESeq2. *Genome Biol.* *15*, 550.
- 1272 Luisier, F., Vonesch, C., Blu, T., and Unser, M. (2010). Fast interscale wavelet denoising of  
1273 Poisson-corrupted images. *Signal Processing* *90*, 415–427.
- 1274 de Marco, M.C., Martín-Belmonte, F., Kremer, L., Albar, J.P., Correas, I., Vaerman, J.P.,  
1275 Marazuela, M., Byrne, J.A., and Alonso, M.A. (2002). MAL2, a novel raft protein of the MAL  
1276 family, is an essential component of the machinery for transcytosis in hepatoma HepG2 cells. *J.*  
1277 *Cell Biol.* *159*, 37–44.
- 1278 Meyer, K., Ostrenko, O., Bourantas, G., Morales-Navarrete, H., Porat-Shliom, N., Segovia-  
1279 Miranda, F., Nonaka, H., Ghaemi, A., Verbavatz, J.-M., Brusch, L., et al. (2017). A Predictive 3D  
1280 Multi-Scale Model of Biliary Fluid Dynamics in the Liver Lobule. *Cell Syst.* *4*, 277-290.e9.

- 1281 Meyer, K., Morales-Navarrete, H., Seifert, S., Wilsch-Braeuninger, M., Dahmen, U., Tanaka,  
1282 E.M., Bruschi, L., Kalaidzidis, Y., and Zerial, M. (2020). Bile canaliculi remodeling activates YAP  
1283 via the actin cytoskeleton during liver regeneration . *Mol. Syst. Biol.* *16*.
- 1284 Miller, L. (2010). Analyzing western blots with ImageJ.
- 1285 Mootha, V.K., Lindgren, C.M., Eriksson, K.F., Subramanian, A., Sihag, S., Lehar, J., Puigserver, P.,  
1286 Carlsson, E., Ridderstråle, M., Laurila, E., et al. (2003). PGC-1 $\alpha$ -responsive genes involved in  
1287 oxidative phosphorylation are coordinately downregulated in human diabetes. *Nat. Genet.*
- 1288 Morales-Navarrete, H., Segovia-Miranda, F., Klukowski, P., Meyer, K., Nonaka, H., Marsico, G.,  
1289 Chernykh, M., Kalaidzidis, A., Zerial, M., and Kalaidzidis, Y. (2015). A versatile pipeline for the  
1290 multi-scale digital reconstruction and quantitative analysis of 3D tissue architecture. *Elife* *4*.
- 1291 Morales-Navarrete, H., Nonaka, H., Segovia-Miranda, F., Zerial, M., and Kalaidzidis, Y. (2016).  
1292 Automatic recognition and characterization of different non-parenchymal cells in liver tissue. In  
1293 *Proceedings - International Symposium on Biomedical Imaging*, pp. 536–540.
- 1294 Morales-Navarrete, H., Nonaka, H., Scholich, A., Segovia-Miranda, F., de Back, W., Meyer, K.,  
1295 Bogorad, R.L., Koteliansky, V., Bruschi, L., Kalaidzidis, Y., et al. (2019). Liquid-crystal organization  
1296 of liver tissue. *Elife* *8*.
- 1297 Mrozowska, P.S., and Fukuda, M. (2016). Regulation of podocalyxin trafficking by Rab small  
1298 GTPases in 2D and 3D epithelial cell cultures. *J. Cell Biol.* *213*, 355–369.
- 1299 Müsch, A. (2014). The unique polarity phenotype of hepatocytes. *Exp. Cell Res.* *328*, 276–283.
- 1300 Müsch, A. (2018). From a common progenitor to distinct liver epithelial phenotypes. *Curr. Opin.*  
1301 *Cell Biol.* *54*, 18–23.
- 1302 Muzumdar, M.D., Tasic, B., Miyamichi, K., Li, N., and Luo, L. (2007). A global double-fluorescent  
1303 cre reporter mouse. *Genesis* *45*, 593–605.
- 1304 O’Brien, L.E., Zegers, M.M.P., and Mostov, K.E. (2002). Building epithelial architecture: Insights  
1305 from three-dimensional culture models. *Nat. Rev. Mol. Cell Biol.* *3*, 531–537.
- 1306 Ober, E.A., and Lemaigre, F.P. (2018). Development of the liver: Insights into organ and tissue  
1307 morphogenesis. *J. Hepatol.* *68*, 1049–1062.
- 1308 Overeem, A.W., Bryant, D.M., and van IJzendoorn, S.C.D. (2015). Mechanisms of apical–basal  
1309 axis orientation and epithelial lumen positioning. *Trends Cell Biol.* *25*, 476–485.
- 1310 Peng, T., Thorn, K., Schroeder, T., Wang, L., Theis, F.J., Marr, C., and Navab, N. (2017). A BaSiC  
1311 tool for background and shading correction of optical microscopy images. *Nat. Commun.* *8*.
- 1312 Poncy, A., Antoniou, A., Cordi, S., Pierreux, C.E., Jacquemin, P., and Lemaigre, F.P. (2015).  
1313 Transcription factors SOX4 and SOX9 cooperatively control development of bile ducts. *Dev. Biol.*  
1314 *404*, 136–148.

- 1315 Prior, N., Hindley, C.J., Rost, F., Meléndez, E., Lau, W.W.Y., Göttgens, B., Rulands, S., Simons,  
1316 B.D., and Huch, M. (2019). Lgr5+ stem and progenitor cells reside at the apex of a  
1317 heterogeneous embryonic hepatoblast pool. *Dev.* *146*.
- 1318 R Development Core Team (2008). R: A language and environment for statistical computing.
- 1319 Ramnarayanan, S.P., Cheng, C.A., Bastaki, M., and Tuma, P.L. (2007). Exogenous MAL reroutes  
1320 selected hepatic apical proteins into the direct pathway in WIF-B cells. *Mol. Biol. Cell* *18*, 2707–  
1321 2715.
- 1322 Reynolds, A., Leake, D., Boese, Q., Scaringe, S., Marshall, W.S., and Khvorova, A. (2004). Rational  
1323 siRNA design for RNA interference. *Nat. Biotechnol.* *22*, 326–330.
- 1324 Riedl, J., Flynn, K.C., Raducanu, A., Gärtner, F., Beck, G., Bösl, M., Bradke, F., Massberg, S.,  
1325 Aszodi, A., Sixt, M., et al. (2010). Lifeact mice for studying F-actin dynamics. *Nat. Methods* *7*,  
1326 168–169.
- 1327 Sayols, S., Scherzinger, D., and Klein, H. (2016). dupRadar: a Bioconductor package for the  
1328 assessment of PCR artifacts in RNA-Seq data. *BMC Bioinformatics* *17*, 428.
- 1329 Segal, J.M., Kent, D., Wesche, D.J., Ng, S.S., Serra, M., Oulès, B., Kar, G., Emerton, G., Blackford,  
1330 S.J.I., Darmanis, S., et al. (2019). Single cell analysis of human foetal liver captures the  
1331 transcriptional profile of hepatobiliary hybrid progenitors. *Nat. Commun.* *10*.
- 1332 Senga, K., Mostov, K.E., Mitaka, T., Miyajima, A., and Tanimizu, N. (2012). Grainyhead-like 2  
1333 regulates epithelial morphogenesis by establishing functional tight junctions through the  
1334 organization of a molecular network among claudin3, claudin4, and Rab25. *Mol. Biol. Cell* *23*,  
1335 2845–2855.
- 1336 Slim, C.L., Lázaro-Diéguez, F., Bijlard, M., Toussaint, M.J.M., de Bruin, A., Du, Q., Müsch, A., and  
1337 van IJzendoorn, S.C.D. (2013). Par1b Induces Asymmetric Inheritance of Plasma Membrane  
1338 Domains via LGN-Dependent Mitotic Spindle Orientation in Proliferating Hepatocytes. *PLoS Biol.*  
1339 *11*, e1001739.
- 1340 Son, S., Kojima, T., Decaens, C., Yamaguchi, H., Ito, T., Imamura, M., Murata, M., Tanaka, S.,  
1341 Chiba, H., Hirata, K., et al. (2009). Knockdown of tight junction protein claudin-2 prevents bile  
1342 canalicular formation in WIF-B9 cells. *Histochem. Cell Biol.* *131*, 411–424.
- 1343 Subramanian, A., Tamayo, P., Mootha, V.K., Mukherjee, S., Ebert, B.L., Gillette, M.A., Paulovich,  
1344 A., Pomeroy, S.L., Golub, T.R., Lander, E.S., et al. (2005). Gene set enrichment analysis: A  
1345 knowledge-based approach for interpreting genome-wide expression profiles. *Proc. Natl. Acad.*  
1346 *Sci. U. S. A.* *102*, 15545–15550.
- 1347 Szymaniak, A.D., Mahoney, J.E., Cardoso, W.V., and Varelas, X. (2015). Crumbs3-Mediated  
1348 Polarity Directs Airway Epithelial Cell Fate through the Hippo Pathway Effector Yap. *Dev. Cell*  
1349 *34*, 283–296.
- 1350 Tanimizu, N., Mitsuo Nishikawa, Hiroki Saito, Tohru Tsujimura, A.M. (2003). Isolation of

- 1351 hepatoblasts based on the expression of Dlk/Pref-1. *J. Cell Sci.* *116*, 1775–1786.
- 1352 Tanimizu, N., and Mitaka, T. (2016). Morphogenesis of liver epithelial cells. *Hepatol. Res.* *46*,  
1353 964–976.
- 1354 Tanimizu, N., and Mitaka, T. (2017). Epithelial Morphogenesis during Liver Development. *Cold*  
1355 *Spring Harb. Perspect. Biol.* *9*, a027862.
- 1356 Tanimizu, N., Saito, H., Mostov, K., and Miyajima, A. (2004). Long-term culture of hepatic  
1357 progenitors derived from mouse Dlk+ hepatoblasts. *J. Cell Sci.* *117*, 6425–6434.
- 1358 Tanimizu, N., Miyajima, A., and Mostov, K.E. (2007). Liver progenitor cells develop  
1359 cholangiocyte-type epithelial polarity in three-dimensional culture. *Mol. Biol. Cell* *18*, 1472–  
1360 1479.
- 1361 Tanimizu, N., Kaneko, K., Itoh, T., Ichinohe, N., Ishii, M., Mizuguchi, T., Hirata, K., Miyajima, A.,  
1362 and Mitaka, T. (2016). Intrahepatic bile ducts are developed through formation of  
1363 homogeneous continuous luminal network and its dynamic rearrangement in mice. *Hepatology*  
1364 *64*, 175–188.
- 1365 Treyer, A., and Müsch, A. (2013). Hepatocyte polarity. *Compr. Physiol.* *3*, 243–287.
- 1366 Ueno, Y., Alpini, G., Yahagi, K., Kanno, N., Moritoki, Y., Fukushima, K., Glaser, S., LeSage, G., and  
1367 Shimosegawa, T. (2003). Evaluation of differential gene expression by microarray analysis in  
1368 small and large cholangiocytes isolated from normal mice. *Liver Int.* *23*, 449–459.
- 1369 Wang, T., Yanger, K., Stanger, B.Z., Cassio, D., and Bi, E. (2014). Cytokinesis defines a spatial  
1370 landmark for hepatocyte polarization and apical lumen formation. *J. Cell Sci.* *127*, 2483–2492.
- 1371 Watanabe, N., Tsukada, N., Smith, C.R., and Phillips, M.J. (1991). Motility of bile canaliculi in the  
1372 living animal: Implications for bile flow.
- 1373 Wolter, S., Löschberger, A., Holm, T., Aufmkolk, S., Dabauvalle, M.C., Van De Linde, S., and  
1374 Sauer, M. (2012). RapidSTORM: Accurate, fast open-source software for localization  
1375 microscopy. *Nat. Methods* *9*, 1040–1041.
- 1376 Woods, A., Heslegrave, A.J., Muckett, P.J., Levene, A.P., Clements, M., Mobberley, M., Ryder,  
1377 T.A., Abu-Hayyeh, S., Williamson, C., Goldin, R.D., et al. (2011). LKB1 is required for hepatic bile  
1378 acid transport and canalicular membrane integrity in mice. *Biochem. J.* *434*, 49–60.
- 1379 Yang, L., Wang, W.-H., Qiu, W.-L., Guo, Z., Bi, E., and Xu, C.-R. (2017). A single-cell  
1380 transcriptomic analysis reveals precise pathways and regulatory mechanisms underlying  
1381 hepatoblast differentiation. *Hepatology* *66*, 1387–1401.
- 1382 Yuan, H., Zhang, H., Wu, X., Zhang, Z., Du, D., Zhou, W., Zhou, S., Brakebusch, C., and Chen, Z.  
1383 (2009). Hepatocyte-specific deletion of Cdc42 results in delayed liver regeneration after partial  
1384 hepatectomy in mice. *Hepatology* *49*, 240–249.

- 1385 Zeigerer, A., Gilleron, J., Bogorad, R.L., Marsico, G., Nonaka, H., Seifert, S., Epstein-Barash, H.,  
1386 Kuchimanchi, S., Peng, C.G., Ruda, V.M., et al. (2012). Rab5 is necessary for the biogenesis of  
1387 the endolysosomal system in vivo. *Nature* *485*, 465–470.
- 1388 Zeigerer, A., Wuttke, A., Marsico, G., Seifert, S., Kalaidzidis, Y., and Zerial, M. (2017). Functional  
1389 properties of hepatocytes in vitro are correlated with cell polarity maintenance. *Exp. Cell Res.*  
1390 *350*, 242–252.
- 1391 Zerbino, D.R., Achuthan, P., Akanni, W., Amode, M.R., Barrell, D., Bhai, J., Billis, K., Cummins, C.,  
1392 Gall, A., Girón, C.G., et al. (2018). Ensembl 2018. *Nucleic Acids Res.* *46*, D754–D761.
- 1393
- 1394

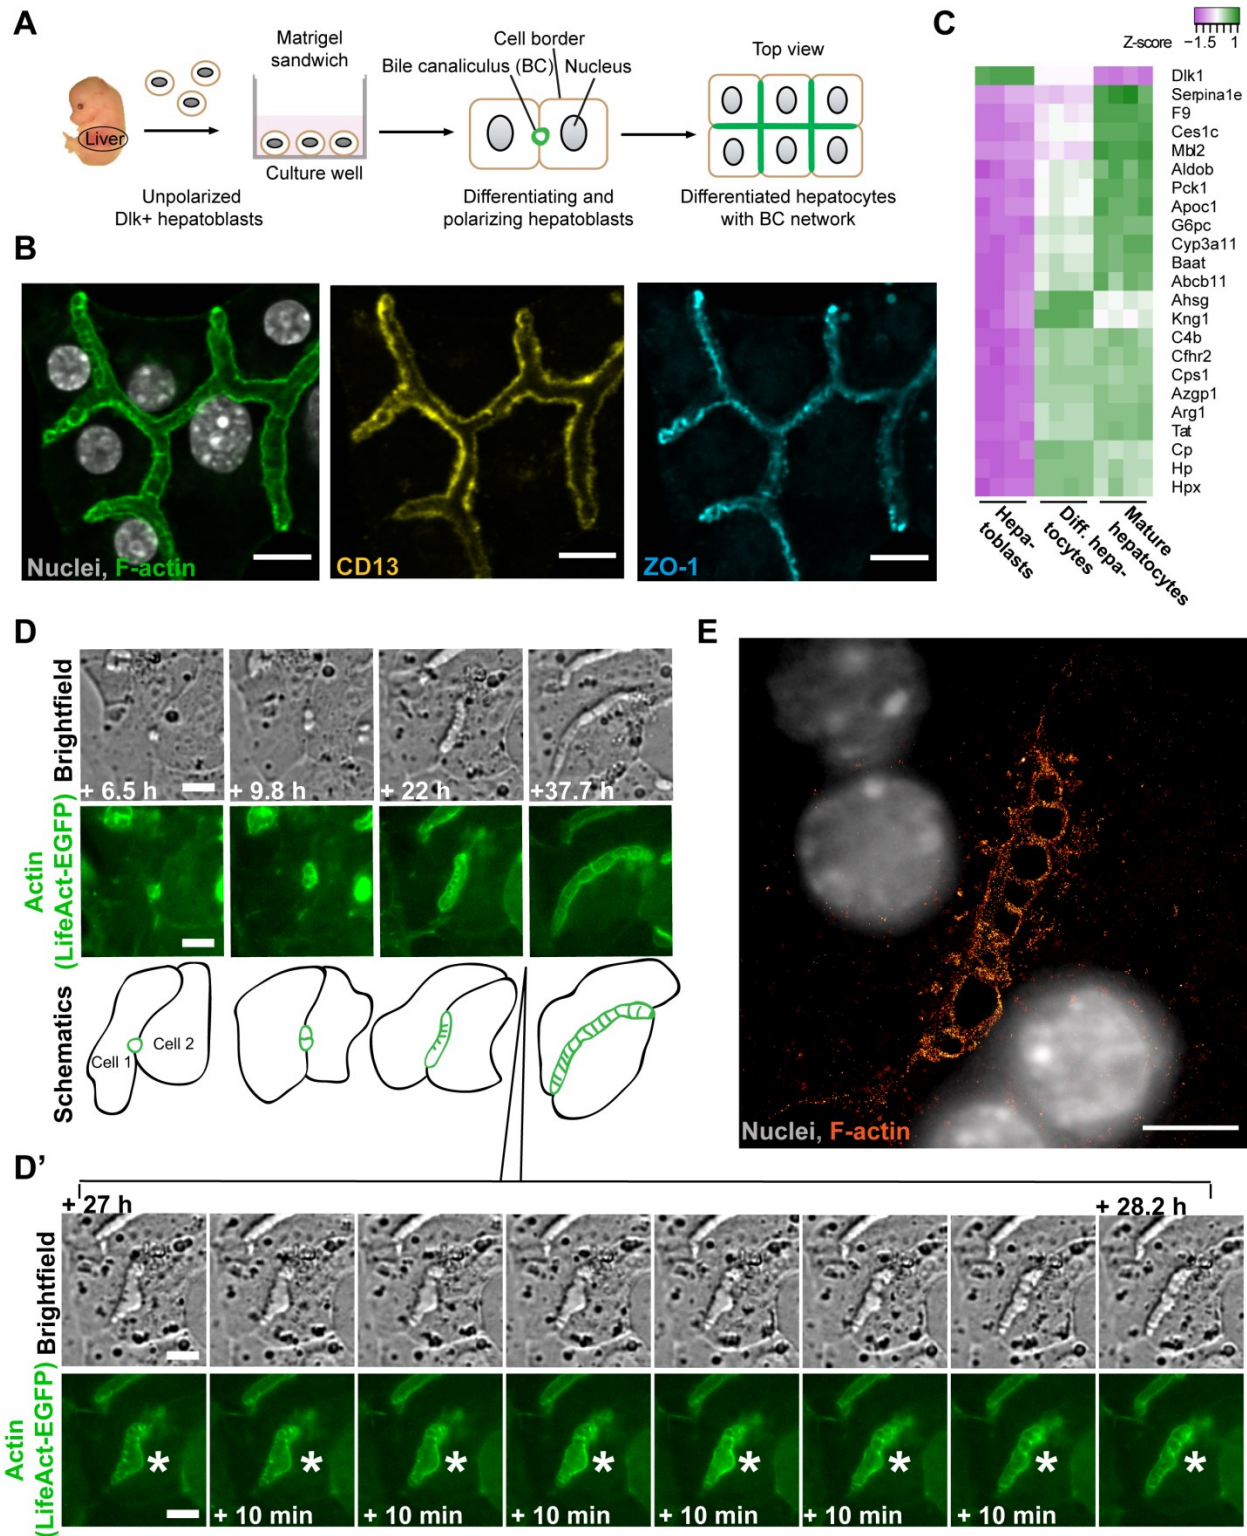

**Figure 1: Lumen morphogenesis in hepatocytes is accompanied by specific actin structures that interconnect the two lumen-forming cells (See also Figure S1)**



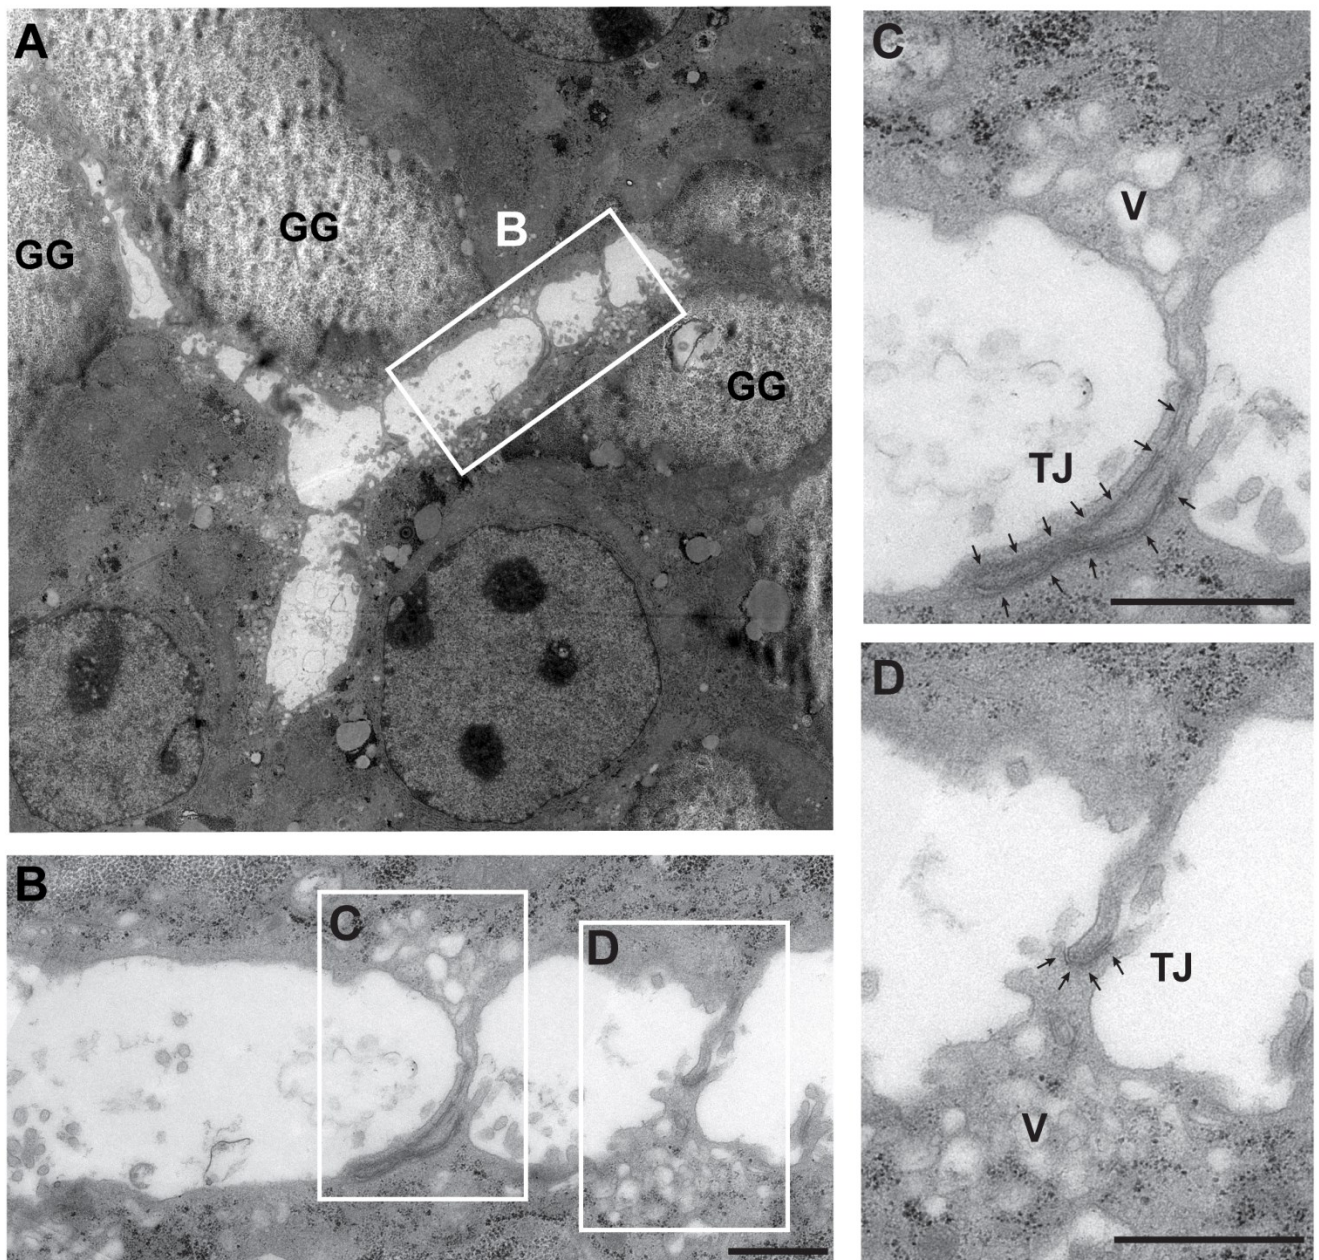

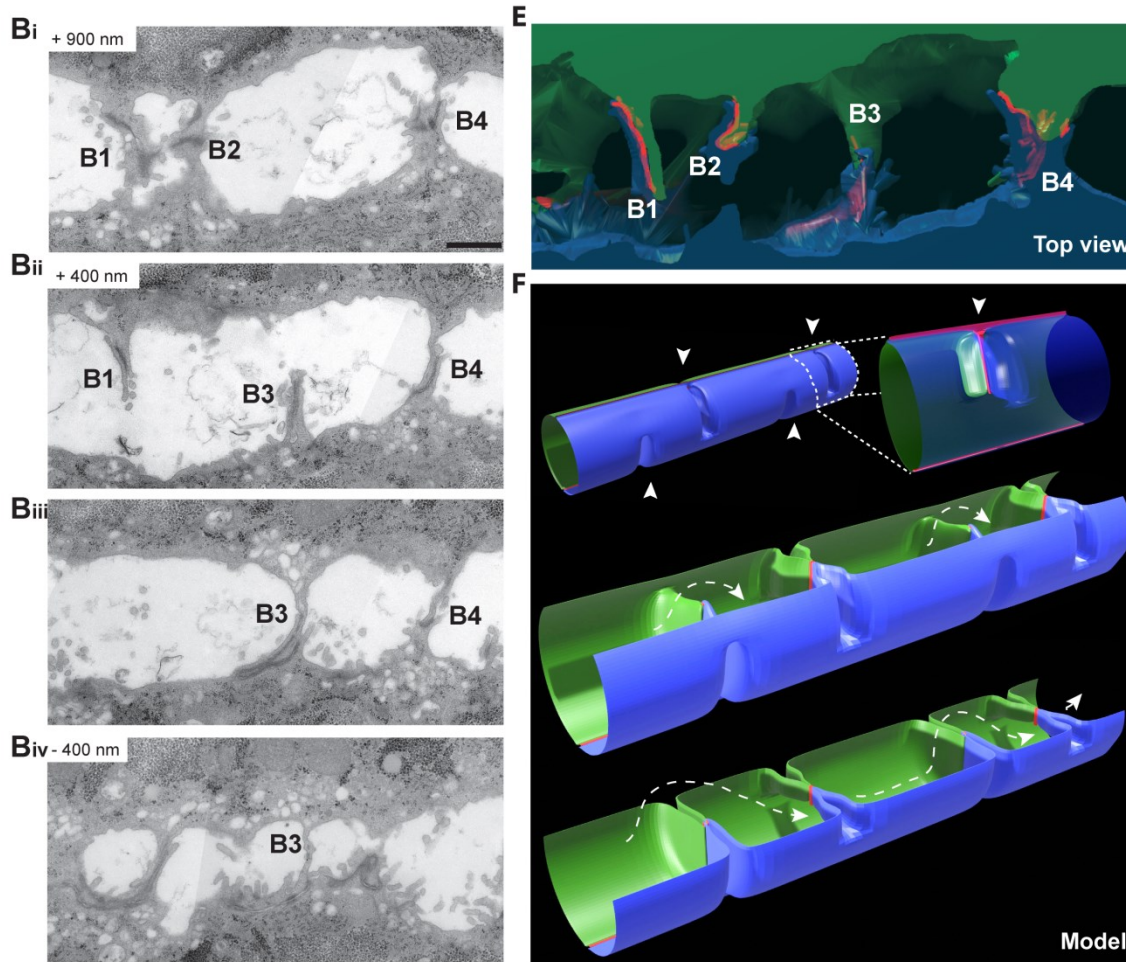

**Figure 2: Ultra-structural analysis reveals a bulkhead-like pattern of transversal structures sealed by T-shaped tight junctions in the BC lumen**

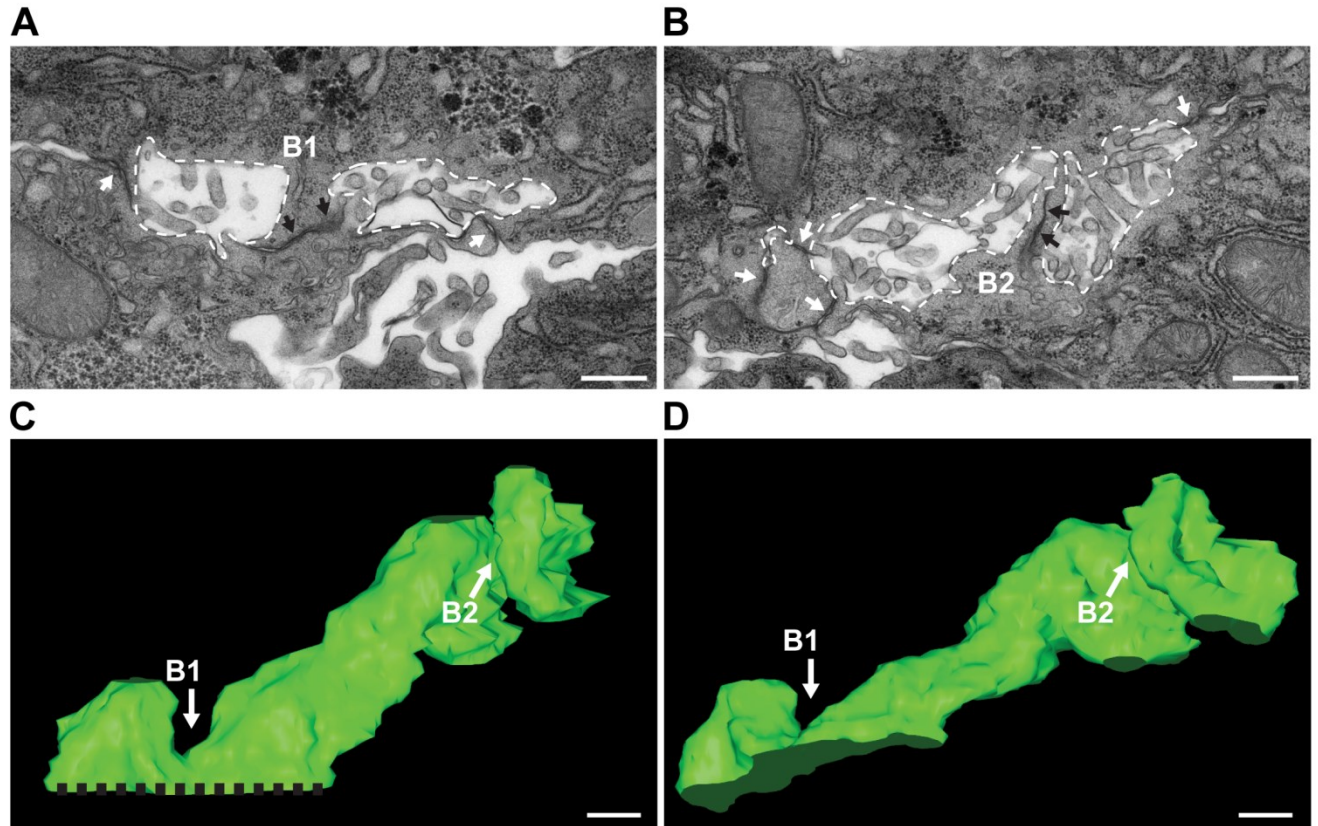

**Figure 3: Transversal apical membrane structures form during BC lumen morphogenesis in embryonic liver**

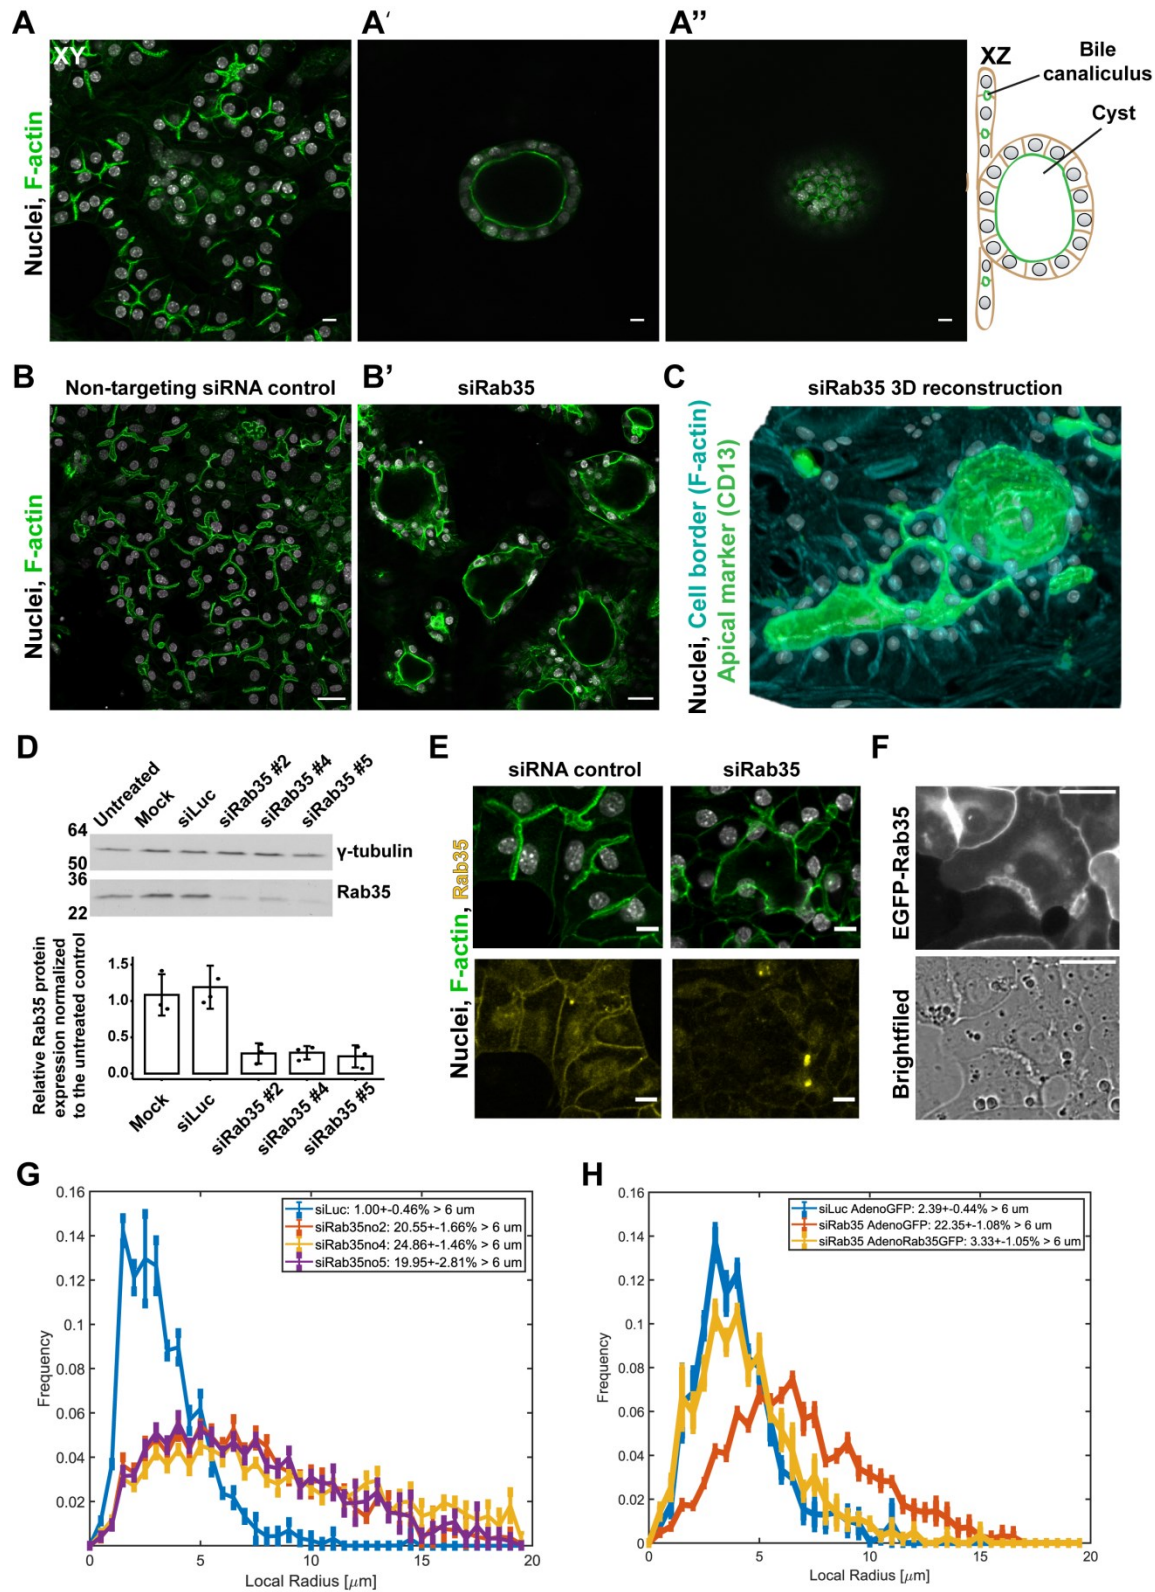

Figure 4: Conversion of hepatocyte polarity into simple apico-basal polarity (See also Figure S4)

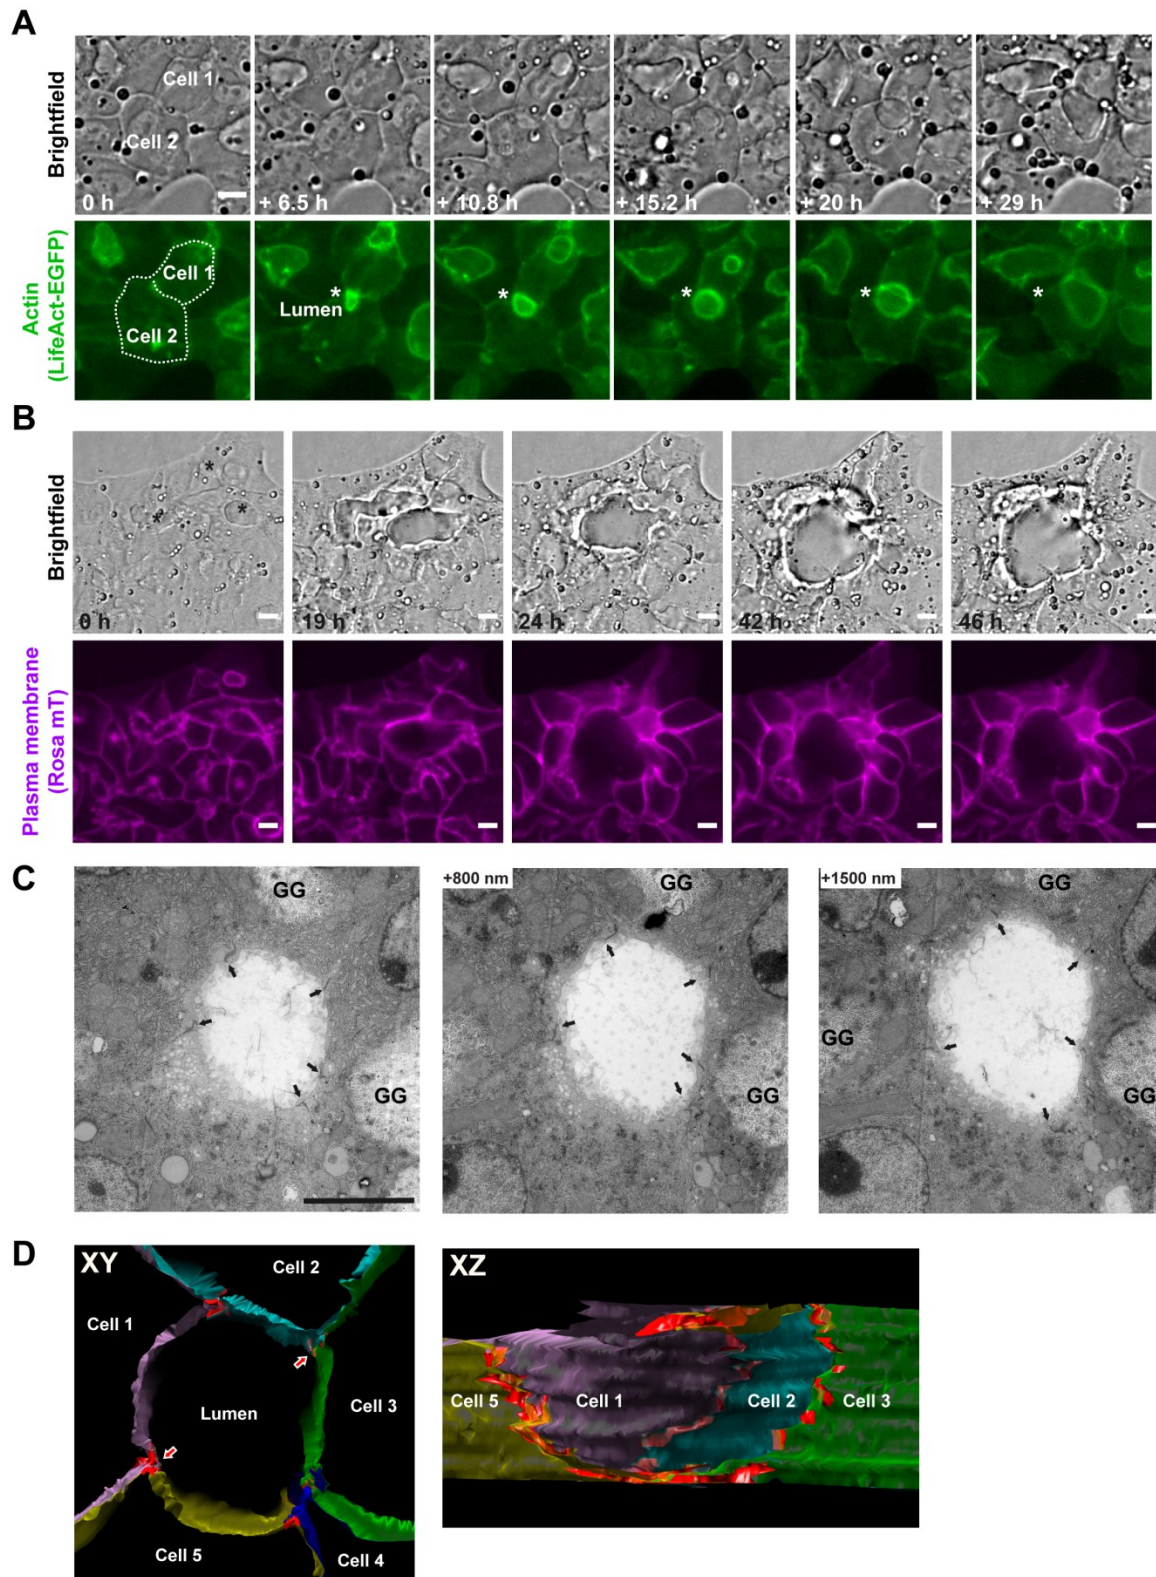

**Figure 5: Silencing of Rab35 causes the loss of the transversal apical membrane bulkheads and formation of spherical cysts via a cell self-organization process**

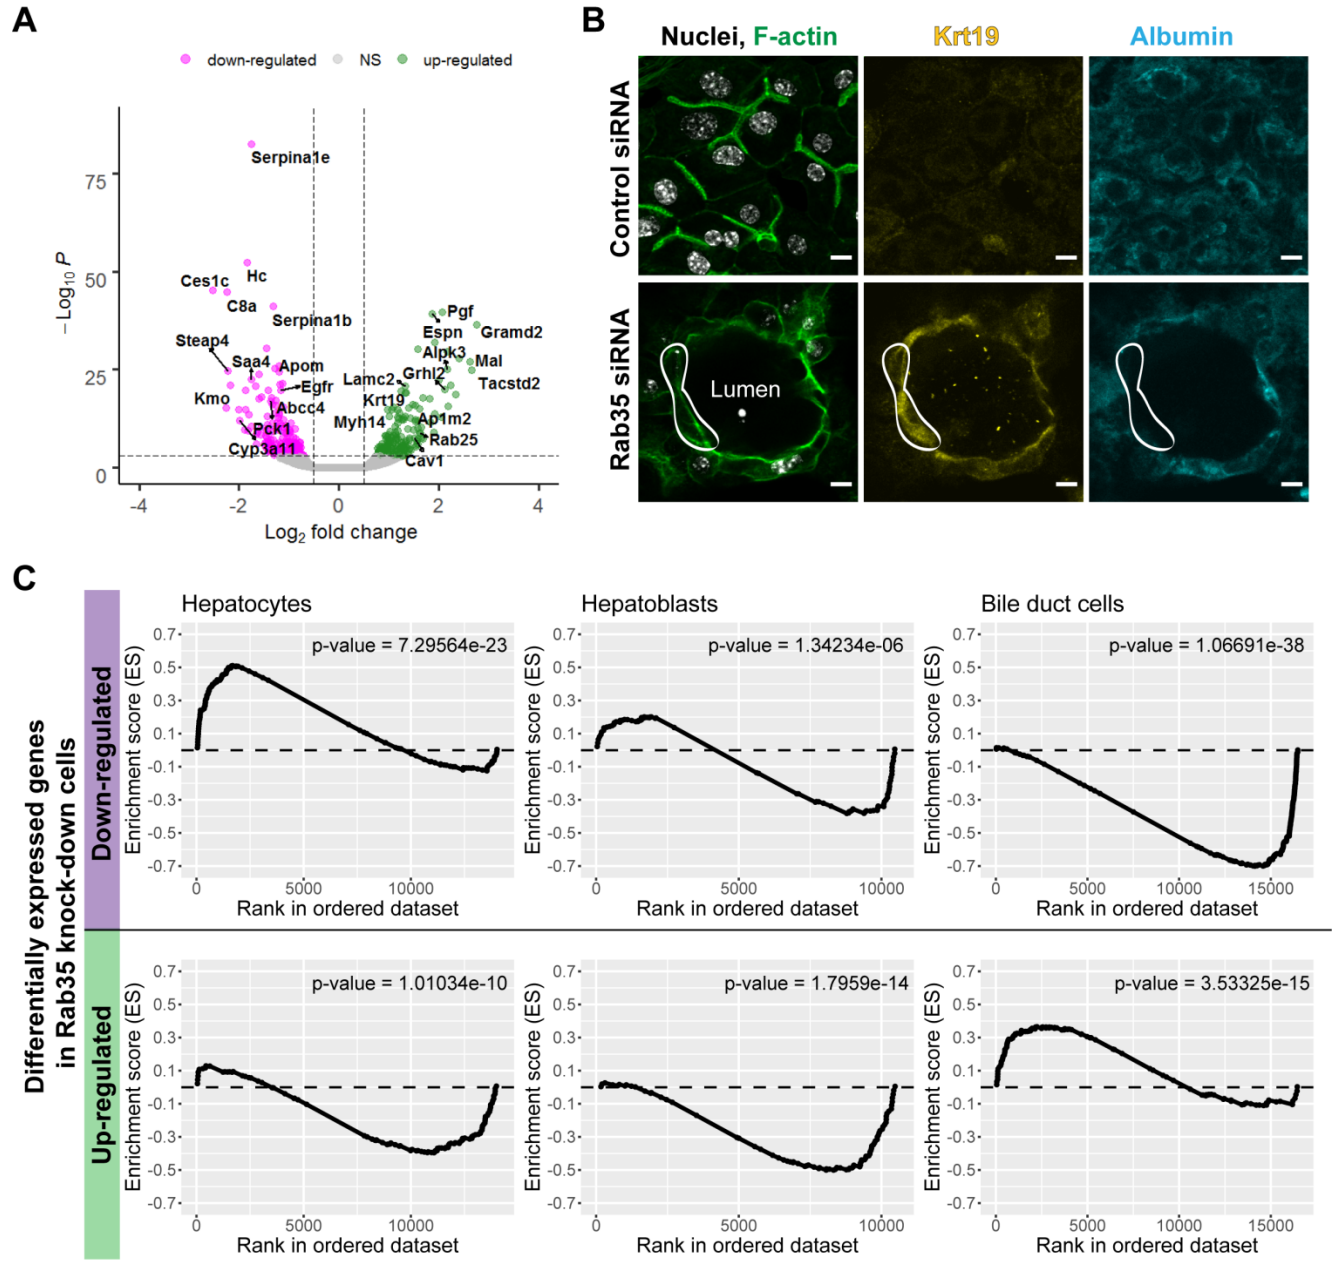

**Figure 6: Down-regulation of Rab35 affects hepatocyte differentiation**

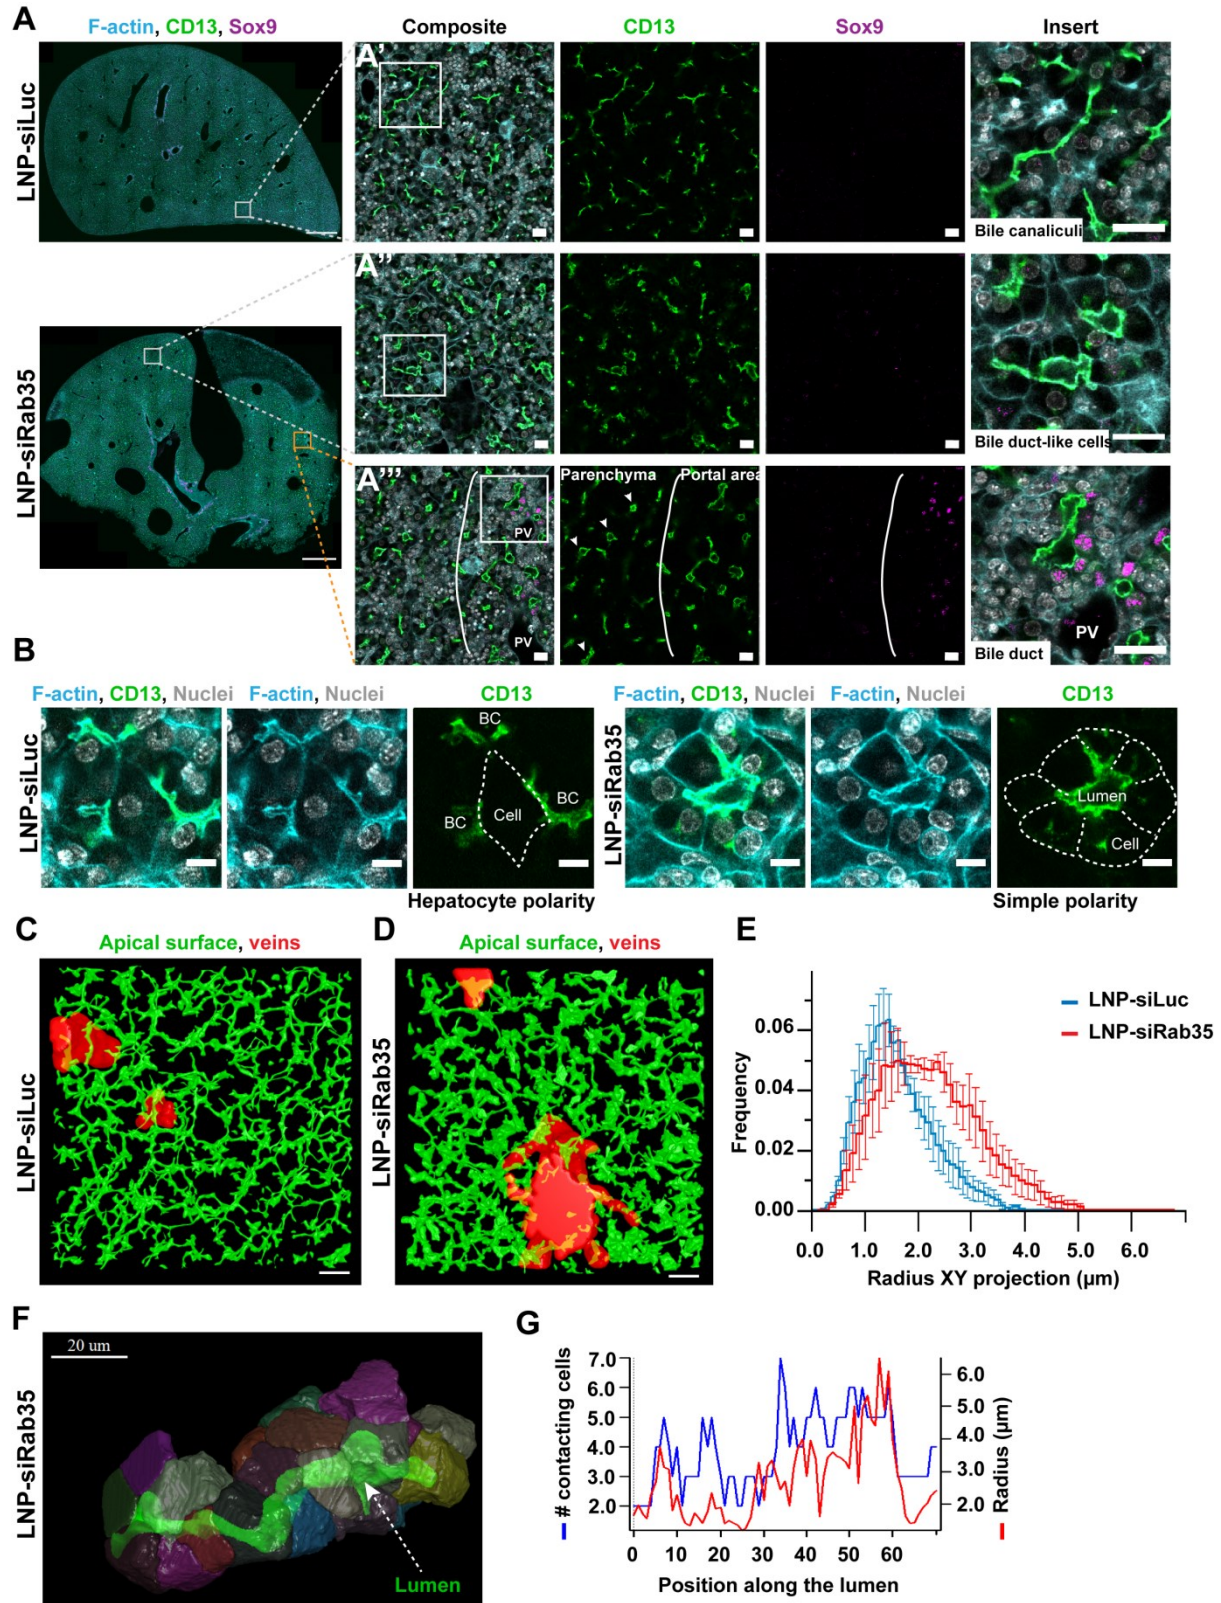

Figure 7: Silencing of Rab35 *in vivo* results in altered cell polarity and liver tissue architecture (See also Figure S7)

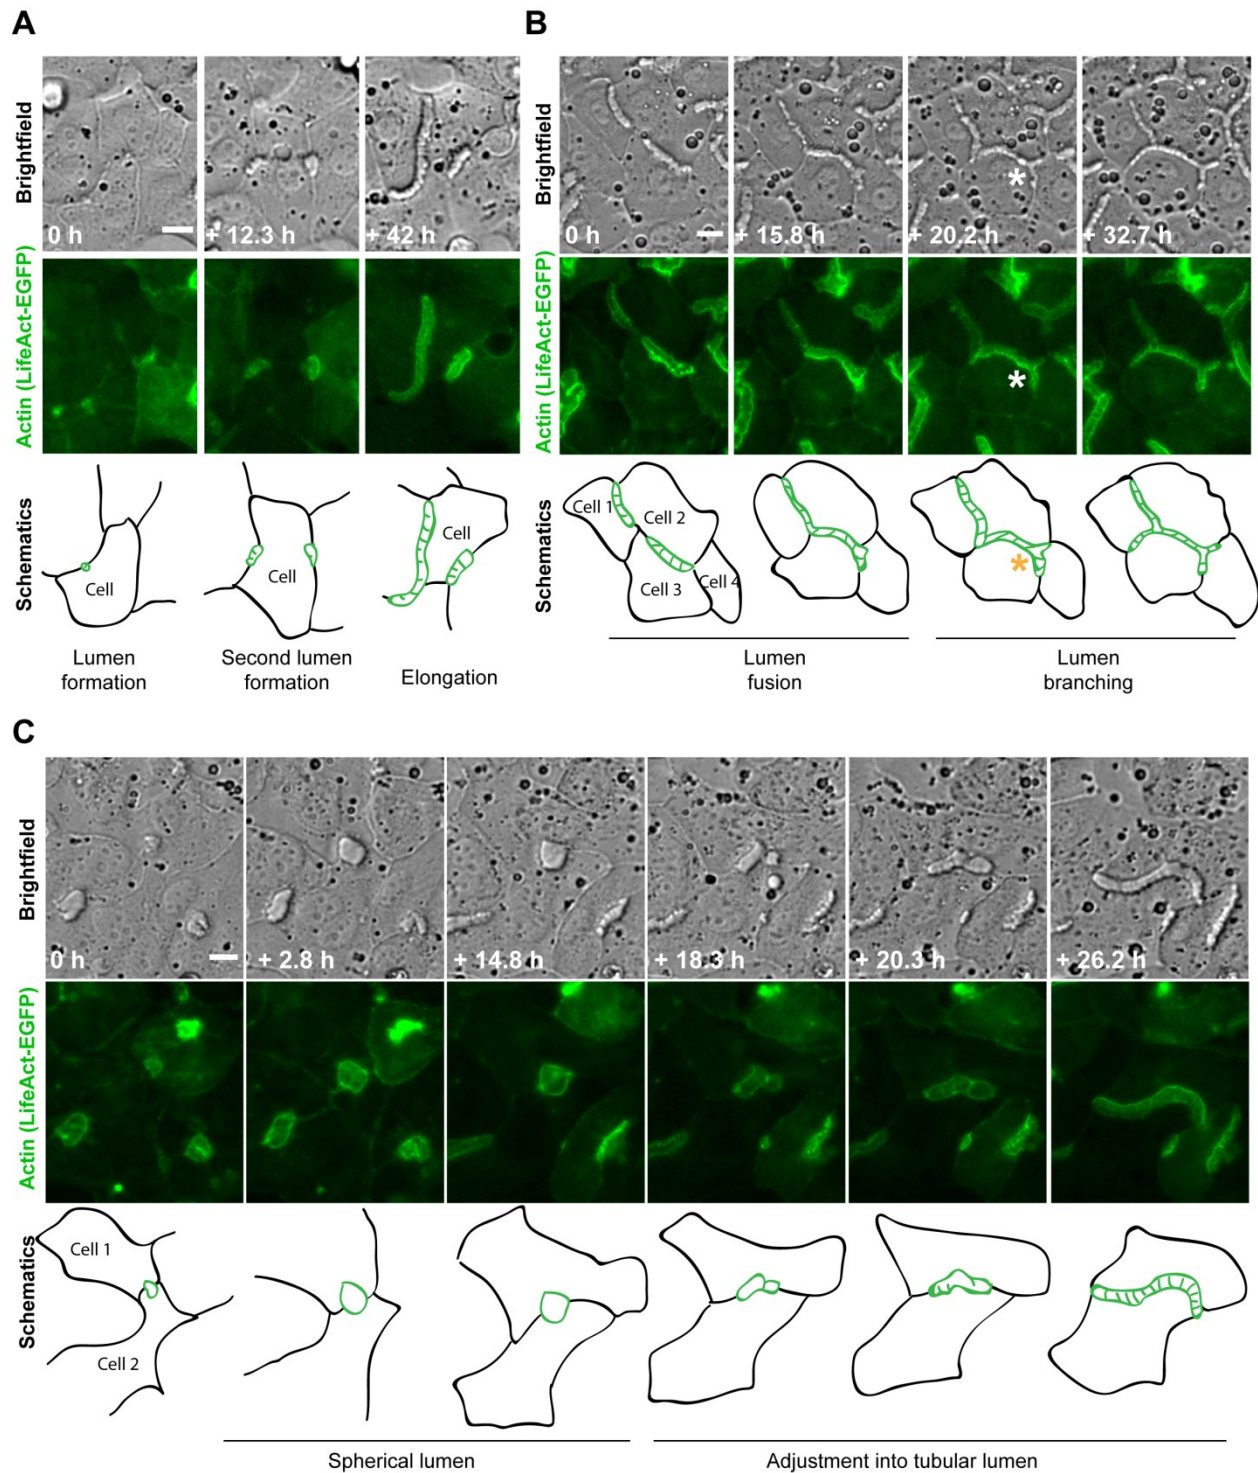

**Figure S1 (Related to Figure 1): Live-cell video microscopy images of BC morphogenesis in LifeAct-EGFP expressing cells**



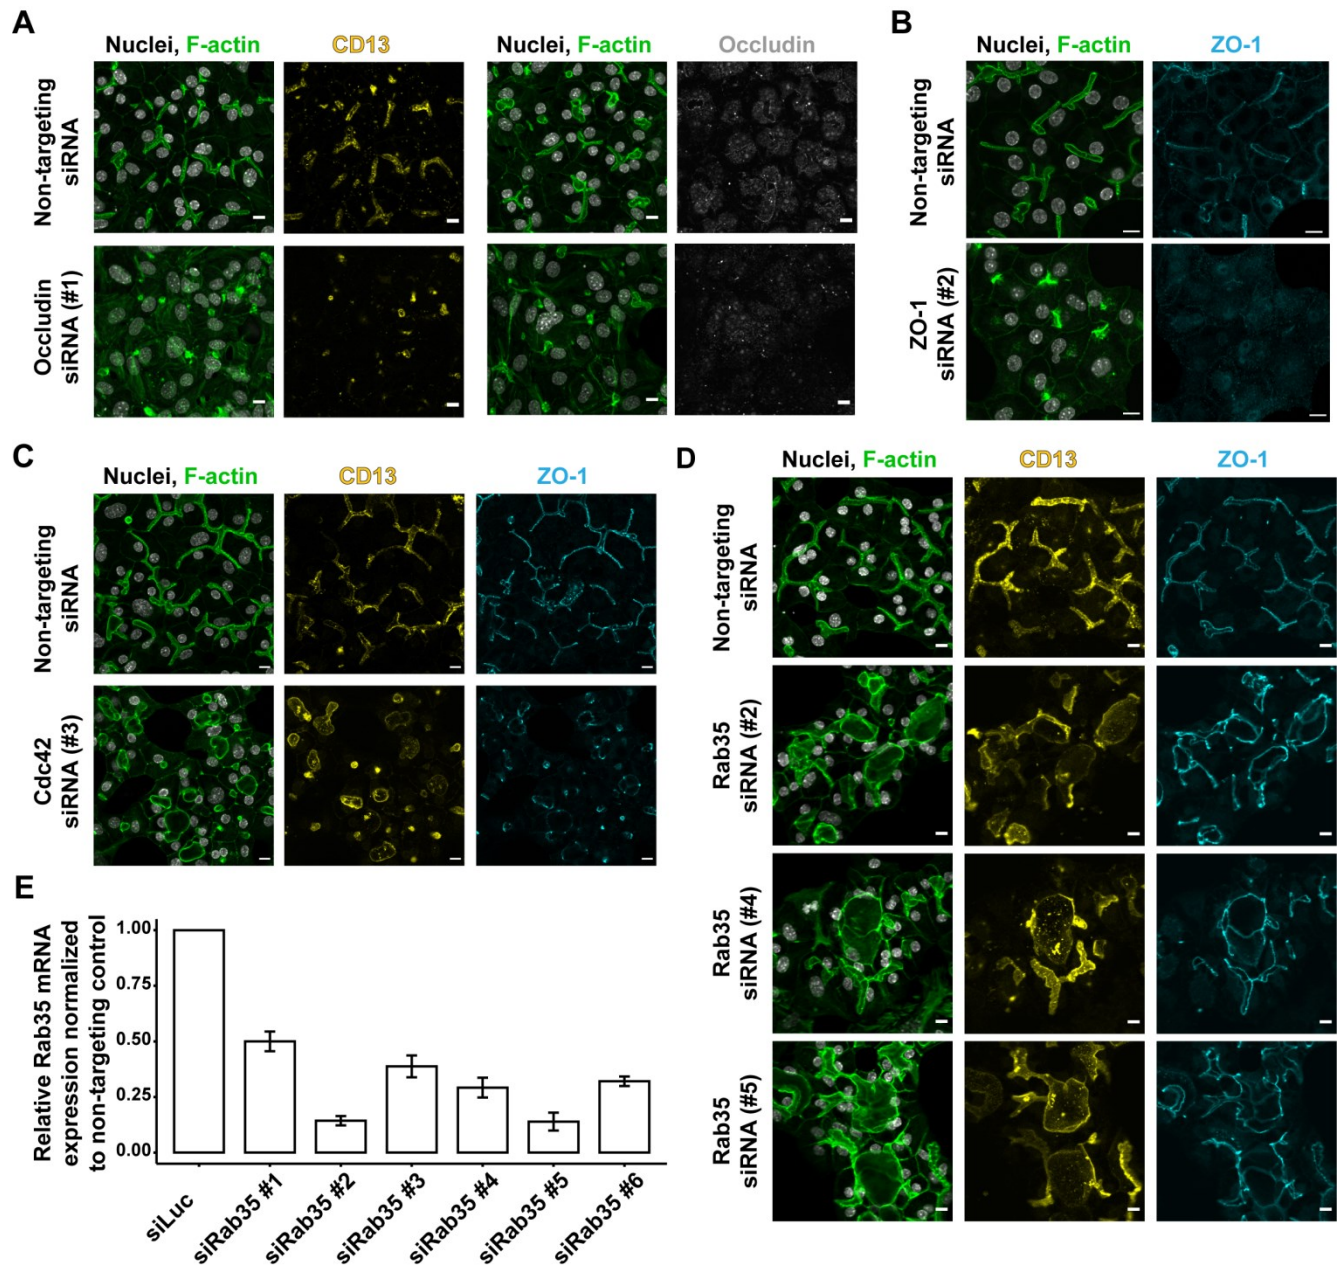

**Figure S4 (Related to Figure 4): Conversion of hepatocyte polarity into simple apico-basal polarity**

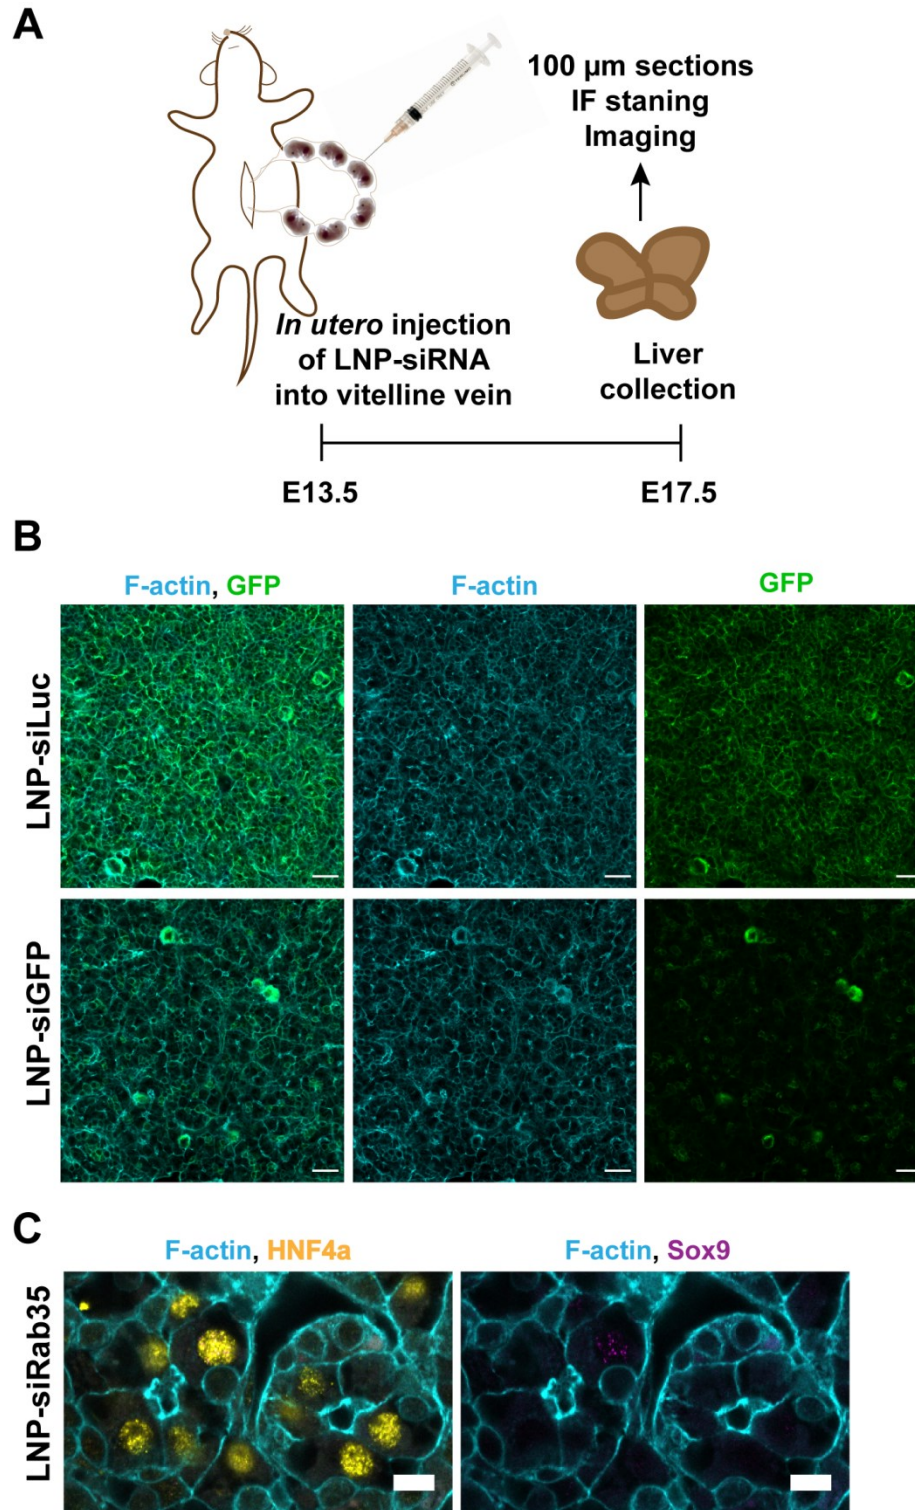

Figure S7 (Related to Figure 7): *In utero* injection method validated by silencing GFP in GFP-expressing mouse line
